# Supplementary material for: Sagittal Abdominal Diameter as a Surrogate Marker of Insulin Resistance in an Admixtured Population—Brazilian Metabolic Syndrome Study (BRAMS)
Source: PLoS One. 2015 May 7;10(5):e0125365. doi: 10.1371/journal.pone.0125365 (PMC4423830; doi:10.1371/journal.pone.0125365)
Supplement: S1 Dataset — (XLSX) [file pone.0125365.s001.xlsx]

## Sheet: Data for Plos One
Age	BMI	WC	WHR	SAD	Systolic blood pressure	Dyastolic blood pressure	Free fat mass	Glucose	Insulin	Triglycerides	cholesterol	HDL	LDL	AST	ALT	Gamma GT	Uric acid	Adiponectin
24	23.263	84.1	0.822092	17.3	120	80	41.4	81	3.15	69	178	46	118	17	14	10	3.4	5.13
27	22.8771	80	0.802407	16.4	100	70	41.7	84.3	7.97	56	117	51	55	16		13	3.8	3.27
63	25.0042	92.9	0.911678	18.4	100	70		77	4.09	51	181	53	118	16	11	11	3.1	2.05455
51	20.7395	74	0.785563	14	112	80		72	2.09	53	200	84	105	18	12	8	4.7	2.23922
29	21.4425	82.75	0.850026	16.45	110	70	45.3	88.7	10.75	53	195	70	114	15	16	8	3.3	5.64
28	23.2135	84.6	0.825366	18.2	100	70	48.3	75.4	4.37	48	162	74	78	28	14	21	5.2	5.42
38	33.3657	105.5	0.985981	21.1	120	80	40.6	94.1	15.4	141	208	46	133	22	48	83	3.4	1.54
26	21.8418	77	0.812236	14.3	120	80	36.3	77.7	1.5	75	154	53	86	25	15	8	3.3	3.79
39	19.4522	80.7	0.840625	16	90	60	36.4	89.8	4.46	50	156	58	88	17	11	12	3.2	4.1
35	24.577	85.3	0.837095	16.3	120	80	48.1	82.4	5.69	98	153	67	66	18	16	18	4.6	2.31
23	21.9318	74.7	0.786316	17.3	90	60	43.6	85.7	11.94	95	175	79	77	16	10	11	3.8	6.55
41	20.7004	81.2	0.873118	18.5	130	90	33	86.1	7.3	115	206	36	147	13	11	15	2.6	4.29
47	23.0646	81.7	0.86	17	110	80	40.3	99.9	12.06	144	235	42	164	20	18	10	4.6	3.03
40	26.102	92	0.831826	17.9	110	90	49.2	85.9	2.59	47	192	65	118	20	12	13	3.7	3.5
22	23.3577	84.9	0.825875	18.5	110	70	42.9	80.9	15.61	218	190	61	85	15	12	54	4	4.55
40	26.102	92	0.831826	17.9	110	90		90	2.56	47	192	65	118	20	12	13	3.7	9.36884
29	21.2571	86.2	0.856859	18.4	100	70	45.6	93.9	5.39	57	146	49	86	12	18	13	3.1	6.41
26	21.4786	72.5	0.778733	14.6	110	70	39.5	84.8	7.59	51	154	51	93	27	26	13	3.4	5.75
37	23.9431	77.9	0.834047	16.1	110	80	36.6	103	4.91	51	176	65	101	9	15	11	3.5	3.09
61	23.6541	81.5	0.84456	17	110	80		76	4.27	77	191	61	115	27	18	19	4.3	11.5113
62	30.7443	93.4	0.866419	19.6	160	100		96	10.1	122	190	48	118	16	13	16	4.2	3.34
26	30.8258	95.8	0.941986	20.6	100	70	52.8	89.8	7.03	84	178	76	85	27	31	21	4.2	6.11897
57	20.7612	76.5	0.809524	15.3	90	60		81	4.71	61	187	91	84.2	21	21	18	3.7	5.09816
46	31.7287	103.1	0.841633	23.1	150	90	51.9	96.5	4.09	68	208	64	130	19	24	46	3.6	3.55421
54	26.7759	79	0.838641	22.3	120	60		89.8	7.96	104	184	43	120	20	15	17	3.4	3.1165
52	21.9899	83.1	0.883103	16.9	100	80	41.7	90.1	3.83	181	213	51	126	14	11	14	3.1	6.02
45	29.955	95.3	0.892322	20.9	130	90	51.9	86	12.5	71	123	46	63	22	20	15	4.7	1.67053
61	29.5583	93.3	0.757305	20.5	120	80		81	8.27	80	170	61	93	23	22	18	6.7	1.11924
29	29.1121	99	0.879218	20.2	110	70	51.4	88.9	6.53	58	159	54	93	16	8	14	3.5	4.72241
24	30.0529	89.25	0.784271	19.6	90	65	51.3	79.5	4.16	50	141	49	82	20	15	9	3.9	5.41061
36	31.7578	105.25	0.994802	22.75	120	70	53.1	98.5	23.37	456	260	34	135	23	33	115	4.8	1.14915
46	28.2184	93.7	0.884797	19.3	130	80	49.1	95.7	9.57	233	219	39	133	21	34	48	5.6	1.12
60	24.8056	88	0.871287	19.3	120	70		72.7	3.75	109	229	57	150	14	7	12	5	5.09816
54	31.4256	104	0.981132	23.9	130	90		101	7.59	129	201	55	120	21	14	8	2.8	2.71725
44	40.4339	126	0.997625	25.2	100	70	55.3	89.7	12.49	154	164	40	93	14	14	22	4.5	1.25
29	33.0078	100.7	0.859949	21.9	120	80	50.4	96	11.45	114	168	49	96	18	23	25	4.7	3.09
30	41.2194	125	1	29.5	112	70	58.6	87.2	3.48	123	195	46	124	17	16	23	3.4	1.51
47	33.9879	106.3	0.875618	20.7	110	60	54.6	91.1	4.22	97	193	54	120	12	17	17	4.4	1.97
34	30.6315	103.3	0.893599	21.3	100	70	51.4	92.1	5.65	57	140	58	71	22	15	11	4.7	1.6
40	32.7694	101.7	0.852473	23.1	110	70	53.1	71.8	6.57	87	193	45	131	18	17	14	3.5	3.39981
34	41.3348	111.5	0.855718	25.1	120	80	53.5	87.2	16.33	228	220	71	103	12	9	19	6	3.58774
35	43.4318	121.4	0.893962	26.4	130	90	59.7	96.8	5.98	100	169	42	107	15	19	28	5	1.90072
44	39.6703	122.3	0.955469	28.2	150	90	58	96.7	16.2	121	165	39	102	20	18	27	6.6	2.29
62	32.4467	105	0.967742	24.2	120	80		108	15.91	155	226	35	160	17	27	29	6.3	3.30448
49	41.2357	121.9	0.953088	29.75	120	90	54.1	109	27.78	106	224	54	149	38	25	74	5	2.66126
43	36.4354	115.2	0.94659	25.6	160	110	59.1	121	17.41	215	226	44	139	16	16	25	6.1	1.5
53	31.0797	103	0.962617	26.3	110	70	40.4	97	60.6	146	212	55	128	41	39	35	7.3	3.95
55	39.6131	110	1.07843	25.4	140	110	48.7	103	43	217	186	38	105	20	31	59	5	3.88
23	29.3559	90.3	0.748756	21.4	100	72	49.5	88	47.3	89	172	43	111	16	13		4.6	3.9
47	42.9448	121	0.945312	29.5	130	90	63.1	87	38.9									3
29	41.4296	102	0.894737	31.5	110	80	58	89	37.4	184	287	48	202	16	16	60	5.8	3.31
51	38.3097	113	1.08654	26.5	156	95	56.8	111	29.5	79	217	36	165	19	8	48	8.2	1.73
61	47.5482	118.2	0.925607	29.4	150	100	62.1	100	30.1	78	247	52	179	38	29	16	7.8	2.66
31	40.551	123.5	0.968627	29.4	130	110	63.1	105	26.7	94	184	45	120	20	20	74	6.3	2.17
31	40.6748	124	0.932331	30.8	130	90	57	83	31.6	98	195	37	138	13	9		5.2	2.84
19	28.5218	103	0.953704	21.8	120	80	53	93	28.1	70	219	33	172	17	24		3.1	1.98
63	44.3674	113	0.933884	29	115	80	53.4	100	25.6	209	284	40	202	24	11		9.2	1.98
64	32.9039	102.5	0.971564	21.5	138	93		105	23.9	184	153	36.3	78.9	20	23	19.1	4	7.14
61	47.4363	124	0.873239	32.5	183	117	56.4	109	22.7	99	185	44	121	21	18	18	6.8	3.06
39	31.7586	104.4	0.921447	24.6	110	80		109	22.59	122	173	43	106	17	10	11	4.8
39	32.341	103.7	0.95841	24	110	80	48.6	86	28.6	200	151	55	86	24		25		1.39
27	36.169	115.6	0.899611	28	121	79	63.4	96	24.7	136	214	35	152	70	72	95	7.6	4.41
19	33.9826	111	0.986667	25	120	80	50	83	27.5	351	224	31	123	18	25		5.8	5.43
42	28.1975	94.2	0.880374	20.3	122	90	40.7	74	30.3	59	158	51	95	19	14	8	5.6	4.56
56	35.7012	119.6	1.06028	24.3	170	110		96	23.32	213	192	36	113	20	19	67	4.6	1.7503
41	46.4559	127	0.992188	32.2	110	90	64.4	101	22.1	93	159	40	100	16	21	41	4.8	3.25
38	26.8633	99.8	0.959615	20	120	80	48.5	88	25.1									2.57
23	33.4821	103	0.880342	25.3	110	80	57.9	85	25.9	76	170	66	89	15	9	9	3.8	3
21	40.2601	117	0.914062	26.4	130	90	66.3	82	26.8	156	150	42	77	19	15	34	6.6	2.93
19	26.6749	95	0.855856	19	120	80	54.8	98	22	161	231	69	130	14	17		3.9	5.43
51	45.2005	121.5	0.972	29.6	120	90	59	87	24.5	64	110	40	58				4.9	1.28
23	39.3316	114	0.870229	24.5	130	100	61.2	86	24.7	120	195	51	120	18	29		4.4	3.51
37	26.6436	94	0.87037	22	100	70	52	79	26.4	149	246	36	180	32	31	17	4	1.41
50	29.4468	102.5	0.966981	22.4	120	80	50.8	104	19.9	89	216	41	157	16	21	37	4.8	10.78
39	29.9391	102.5	0.995146	22.8	144	95	55.9	99	20.9	112	202	46	134	24	28	23	4.8	2.84
23	25.1479	83	0.821782	17.3	113	73	43	113	18.23	253	236	46	140					2.29
29	26.4246	82	0.775047	17.8	114	72	41.4	90	22.7	68	218	73	131	17	13	10	3.9	5.26
32	42.1742	104	0.709898	27.5	111	84	64	70	28.8	172	206	77	95	17	18	34	6.3	2.72
33	29.1363	90	0.789474	20.5	130	80	44.3	96	20.8	123	150	63	63	12	9		4.5	3.45
46	32.8208	106.6	0.955197	22.6	140	90	48.4	88	22.6	126	142	36	81	15	10	26	5	3.57
38	45.2675	124	0.935849	32.5	130	90	65.1	91	21.6	151	212	34	148	53	94	109	5.2	2.34
48	29.8326	102.5	0.930127	24.4	130	90		101.333	19.38	349	196	33	93	19	30	103	5.8	2.06108
40	31.6016	104	0.904348	22.4	100	70	50.2	87	22.1	84	149	46	86	18	7	15	4.2	1.27
33	42.1687	123.5	0.942748	28.7	140	90	65.8	81	23.6	105	167	65	81	11	8	10	3.8	1.99
39	25.64	91	0.858491	21.3	100	70	39.2	93	20.5	32	181	74	101	32	28	43	5.4	2.67
22	23.1415	87	0.790909	18.5	110	70	53.3	98	19.4	38	184	77	99	17	15		4.2	1.82
23	33.126	92	0.741935	25.5	127	87	56.9	66	28.5	187	241	59	145	15	11	25	4.7	2.96
41	36.5383	106	0.938053	26.5	140	80	57.3	93	20.1	218	169	46	79	14	18	109	5.5	0.91
40	47.7038	122	0.877698	28	130	110	64.6	74	25.1	75	173	38	120	23	18	40	3.9	2.21
21	31.1614	100	0.840336	22	90	50	59.1	98	18.8	54	133	56	66	13	20		3.3	3.98
36	28.8407	99	0.904936	21.8	110	80		84	21.9	164	188	55	100	26	41	33	3.4
40	37.1821	118	0.918288	27.2	133	86	53.7	87	21.1	121	205	53	128	18	21	25	4.2	3.54
42	39.8948	109	0.810409	23	100	60	56.7	77	23.6	110	284	49	213	15	11	16	5.6	2.31
47	32.9203	101.5	0.845833	22.5	120	70	57.9	108	16.8	98	211	51	140	19	19	22	5.8	5.51
26	22.5694	81	0.794118	18.5	90	50	44.7	73	24.7	97	123	48	56	26	20		4.2	6.94
29	30.5039	95	0.833333	22	113	65	48.3	109	16.4							25		1.61
46	40.9837	132.7	1.0053	27.8	132	110	64.1	74	24	142	211	40	143	20	17		5.7	1.33
49	33.3333	82	0.780952	23	127	77	46	78	22.7	132	226	49	151	14	14	33	7.2	5.26
35	35.244	100	0.833333	21	130	80	51.8	76	23.1	66	145	71	61	23	13	21	3.5	2.93
60	29.5479	102	0.953271	25.5	176	92	58.1	101	17.3	176	221	41	145	21	21	24	6.8	1.84
56	33.2687	105	0.945946	26.5	170	95	48.8	90	19.4	107	272	61	190	15	21		5	1.71
38	35.4925	117.8	1.01029	24.2	120	80	57.3	87	20	111	185	51	111.8	29	25	37	3.9
38	34.7626	102	0.976077	25.7	120	80	45	74	23.5	112	205	75	108	20	20		5.3	3.75
35	31.2174	79	0.88764	23.5	100	80	48.2	83	20.7	100	164	39	105	19	13	35	5.4	2.8
49	26.7394	83	0.768519	22.5	109	84	41.4	111	15.4	177	225	46	143	21	23	42	3.5	3.51
42	35.0922	113	0.94958	25.9	120	90	57.2	86	19.8	62	163	39	112	15	14	12	5	1.48
58	33.9795	97	0.881818	25	130	90	46.8	72	23.3	101	183	61	102	21	29	38	5.6	6.56
21	27.7855	98	0.920188	21.4	141	82	53.4	85	19.6	96	180	49	112	15	19	40	4.2	4.91
31	31.2488	104	0.945455	23	110	80		86	19.36	76	140	45	80	21	28	22	4.5
29	34.0979	100	0.847458	24	124	88	47.2	76	21.8	169	212	48	130	17	14	19	6.1	1.69
46	27.4219	95.5	0.900943	21	110	70	42.1	98	16.8	119	249	46	179	15	10	32	4.1	2.36
47	31.5579	107.5	0.881148	23.4	100	70	48.9	81	20.3	114	221	57	141	20	23	17	3.7	6.21
28	37.5567	111	0.834586	32	120	80	63.2	79	20.8	49	156	43	103	22	24		5.9	2.94
40	29.3947	85	0.765766	21.5	100	60	55.7	90	18.1	125	196	56	115	15	11		5	6.24
33	29.2388	102	0.80315	22	120	80	31.4	89	18.2	163	222	56	133	14	19		4.2	5
39	35.2154	102.5	0.891304	23.8	120	94	50.6	94	17.2	65	151	52	86	24	29	29	5.5	3.2
20	25.0885	91	0.919192	18.5	110	70	41.3	91	17.7	84	187	54	116	24	23		3.9	1.83
41	38.215	89	0.729508	26.5	137	83	53.5	108	14.9	129	239	51	162	24	37	28	6.3	2.23
40	33.2031	101	0.863248	25.5	120	80	59.5	103	15.6	205	257	45	171	15	13	20	5.6	2.67
43	24.4057	88.5	0.988827	19.6	110	70	45.8	88	18.1	270	250	33	163	23	32	21	6.1	2.68
20	32.1609	104.5	1.00771	25.4	110	60	54	78	20.3	130	157	54	77	19	24	26	4.8	5.2
53	31.1697	100	0.943396	24.3	115	90	47.9	78	19.9	220	249	42	163	22	23	16	7	0.95
60	36.2349	106	0.890756	26	131	72		100	15.5	125	191	49.1	117	20	20	17	5.5	1.57
54	33.2621	107.4	1.01801	21.8	138	82	59.5	91	16.9	179	277	69	172	80	25	82	4.8	2.95
40	47.6615	123.4	0.869014	29	154	100	72	80	19.2	80	153	40	96	16	15	29	4.4	2.44
45	31.7503	98.5	0.867841	25.8	120	70		70	21.88	137	154	46	81	35	35	84	4.1	2.93805
57	27.8189	91	0.892157	18	110	70		85	17.91	198	247	47	160	21	26	47	5.4
45	33.9456	102.8	0.863866	23.4	120	80	50.3	92	16.5	85	201	65	119	15	13	15	4.5	1.97
41	37.4753	110	0.990991	25	140	90	54.1	74	20.5	142	218	37	153	19	14	21	4.9	1.3
33	36.3166	113.5	0.953782	26.8	110	80		68	21.99	312	282	58	162	21	19	46	6
45	32.8731	98	0.890909	23	130	110	49.7	84	17.8	193	220	44	137	21	14	28	5.7	5.66
28	21.5978	70	0.736842	17.15	100	70	43.8	93	16	125	227	44	158	18	20		4.3	3.7
27	34.8141	120	1.03448	28	90	60	63.8	83	17.9									2.66
45	27.154	87.9	0.841954	21.2	94	60	45.9	90	16.5	458	231	44	95	26	19	27	5.5	4.29
24	23.1533	79	0.806122	17.9	120	70	39	78	18.8	72	203	78	111	15	11	7	2.5	8.64
26	31.1003	93	0.781513	19.5	120	80	54	80	18.3	60	137	49	76	13	12	12	2.9	1.91
60	36.9971	121	1.03066	31.9	130	94	57.4	75	19.4	274	281	31	195	19	25	35	7.5	2.85
54	24.6904	94.5	0.964286	19.5	120	80	41.8	84	17.3	104	173	57	95	17	13	17	4.4	2.64
52	30.9787	105	1.00478	26.6	120	80	50.7	83	17.5	467	288	41	154	18	17	34	7.9	5.8
39	37.9099	117	0.89313	28	150	110	54.5	75	19.3	35	193	99	87	16	17	24	4.3	3.03
48	40.1463	124	0.96124	29	160	105	55	84	17.2	95	187	56	112	28	24	37	6.7	2.16
44	31.763	94	0.810345	24.5	140	90	51.6	76	19	110	180	44	114	16	17		3.2	6.72
19	29.6208	93	0.794872	23.45	150	70	57.5	73	19.7	84	171	53	101	32	50		3.5	4.08
18	23.7919	81.5	0.783654	17.8	93	50	41.2	87	16.5	71	171	63	94	15	12	10	3.7	2.44
26	48.1484	130	0.866667	30.6	150	96	68	77	18.6	116	161	48	90	12	10	18	5.3	2.16
31	32.3014	95.5	0.945545	23.5	120	80		84.3333	16.8367	88	160	41	101	42	74	126	6.2	2.03745
58	30.3785	106	0.972477	24.3	112	79		120	11.79	88	225	36	171	24	21	22.5	4.2	7.03918
35	45.5896	126	0.961832	28.5	130	90	60.6	86	16.4	158	212	56	124	28	18	31	4.8	3.12
27	27.8713	100.2	0.982353	21.7	110	70		83	16.9833	90	139	43	78	12	13	21	5.2	2.66541
19	27.8876	96	0.8	21.3	120	80	42.5	77	18.2	91	161	36	107	40	43		4.1	1.11
62	30.5882	103.6	1.01969	20.5	140	90	42.8	93	15	260	266	60	154	27	29	27	4.4	3.1
38	34.6567	103	0.919643	24.6	120	80	58.5	83	16.77	253	183	43	89	26	32	26	4.6	2.39
47	29.4316	93	0.894231	20	200	120	44	95	14.6	130	246	45	175	21	24		4.6	2.43
34	29.4321	96	1.06077	22.5	120	80	44.9	87	15.9	351	214	38	106	20	22		4.7	1.13
56	26.465	93	0.93	21.5	100	70	41.9	91	15.2	100	160	48	92	18	18	20	3.4	2.55
46	35.0862	104	0.912281	25.8	120	90	52.1	89	15.5	122	160	56	80	42	35	50	4.84	1.91
52	30.0932	98	0.98	22	130	85	42.6	89	15.5	204	223	42	140	19	15	17	6.3	1.18
38	24.6904	91.4	0.918593	19.5	110	80	44.8	84	16.3	50	184	70	104	18	20	14	2.6	3.81
22	24.4635	84	0.807692	17	100	60	44.5	71	19.2	110	158	56	80	10	10		3.5	2
31	28.8359	99	0.980198	21	120	80	47.6	98	13.91	129	214	59	129					1.6
37	23.6215	89.5	0.886139	16.5	100	64	44.6	73	18.6	77	173	59	99	15	18	23	4.4	4.03
51	30.4	102	0.971429	20.5	130	80	43.7	98	13.8	165	277	38	206	13	10	26	6	7.15
38	26.1341	90	0.9	22	130	90	40.3	79	17.1	1198	382	33	109	37	47	75	5	1.81
47	32.7426	112	0.986784	25.2	122	84	51.2	73	18.5	89	205	58	129	24	31	66	4.8	1.72
41	27.3276	96.6	0.927063	22	120	78	44.1	85	15.7	97	277	55	203	11	12	15	4.9	2.26
29	30.519	86	0.704918	20.05	130	70	56.9	72	18.5	105	164	54	89	26	34		4.4	8.56
51	26.9776	98.3	0.983	21.9	150	100		96	13.87	161	211	62	117	16	19	28	3	4.04829
26	29.3724	96	0.834783	22.5	110	70	48.7	80	16.6	91	195	72	105	20	15		4.4	3.73
59	47.2895	133.1	0.923024	31	140	80		89	14.92	132	161	46	89	27	27	37	5.4
55	26.5106	94	0.945674	20.5	106	72		111	11.96	215	242	43	157	25	28	23.3	5.5	10.12
42	28.2709	92.5	0.91133	19	100	60	44.7	79	16.8	56	168	44	113	32		28	3.15	1.25
54	36.7561	114	0.919355	26.1	110	70		91	14.56	73	283	52	216	26	22	27	4.4
52	32.8375	110	0.944206	25	110	70	54.5	95	13.9	94	144	38	87	25	15	20	4.1	0.8
23	43.2845	134	1.02682	28	130	86	69.8	80	16.4	265	254	46	155	16	23	43	7.4	1.33
51	29.8047	89.5	0.804133	21.6	128	84	44.2	86	15.2	208	224	58	124	15	8	12	4.8	1.77
58	35.4898	108	0.931034	25.5	112	73	43.1	98	13.3	153	177	45	118			26		1.54
65	33.835	103	0.95814	26.5	142	70	48.9	83	15.7	165	224	47	144	19	19	24	5.6	2.67
19	23.7259	88	0.818605	17	120	80	44	85	15.2	149	192	78	84	11	7		3.4	3.19
33	38.5141	125.5	0.988189	29.3	120	80	65.5	87	14.8	138	181	34	119	11	14	22	2.7
25	25.0361	74	0.755102	18.75	114	84	44.7	77	16.7	74	162	49	98	13	10		4.2	1.03
27	31.8168	98	0.890909	22.5	130	90	52.2	82	15.6	97	172	50	103	20	15		4.5	2.8
32	27.5796	99	0.938389	21	110	65	53.3	77	16.6	99	232	74	138	18	16	40	3.4	1.85
20	23.2978	86	0.834951	18	100	70	42	85	15	66	168	41	114	10	6		4.2	4.31
18	23.6609	80.5	0.781553	19	110	70	49.6	81	15.73	170	184	59	91					5.99
31	38.5554	123	1.025	28.8	110	80	65.2	77	16.5	104	152	60	71	28	40	35	3.4	4
32	34.5984	110	0.88	24	100	60	52.7	87	14.6	163	189	34	122	17	12	18	3.5	1.13
28	28.3265	95.5	0.964646	20	161	103	45.7	73	17.4	112	268	56	190	24	17	16	5	6.84
34	35.0293	101	0.834711	24.5	100	60	46	79	16	241	289	39	202	16	13	52	3	1.77
48	38.8739	114.5	0.978632	25.3	100	70	54.1	72	17.5	281	261	40	165	17	16	19	4.9	1.19
56	28.0448	91	0.879227	19	140	90	45.2	89	14.1	121	230	41	165	16	11	20	3.6	1.27
26	24.2938	75.5	0.725962	18.4	110	62	40.5	76	16.5	143	231	63	139	13	14		4.7	2.09
35	29.7913	104	0.928571	21.5	100	60	47.2	87	14.4	74	237	49	173	14	15		3.9	2.69
49	26.9303	91	0.875	21.8	100	80	40.3	81	15.4	77	213	63	135	14	9	33	4	4.2
25	25.9959	101	0.943925	22	120	80	49.5	86	14.5	72	197	57	125	20	18		3.5	2.97
23	25.2524	81	0.826531	19.5	110	75	47.8	76	16.4	34	113	49	57	26	31	18	5.5	2.72
53	27.884	90	0.857143	21	120	80	39.8	89	14	91	210	48	144	16	22	32	5.1	10.01
18	20.3125	58	0.630435	16.65	110	70	38.4	80	15.5	76	163	56	92	15	11		4.6	5.22
41	26.0312	95	0.92233	20.5	130	70	45.3	82	15.1	287	140	48	35	55	66	173	7.5	1.61
33	31.596	98	0.942308	24.5	167	110		98	12.6	119	176	27	126	36	10	40.3	3.1	1.22
46	36.0938	110.6	0.891217	22.5	120	80	51.6	81	15.2	50	165	51	104	60		46	3.5	1.52
21	20.4502	85	0.876289	18.5	113	80	37.4	115	10.68	94	241	59	163					3.82
20	34.3679	111	0.840909	24.5	110	70	60.4	81	15	142	187	44	115	12	11		3.9	1.91
59	25.189	91.6	0.903353	19.5	120	70	40.5	84	14.4	105	183	46	116	22		17	5.2	2.98
49	22.903	89.6	0.887129	17.2	100	70	44.6	108	11.2	68	228	73	141	22	31		3.6	3.41
19	22.0642	69	0.669903	17.35	130	70	43.8	80	15.1	209	233	60	131	22	14		3.8	1.56
37	34.2894	104	0.896552	25.2	110	70	50.7	66	18.3	123	201	49	127	15	14	18	3.2	6.5
53	25.0292	89.3	0.897487	19.6	100	70	48	90	13.4									2.59
18	29.2427	85	0.765766	22.15	110	70	47.5	78	15.4	81	121	39	66	30	43		4.6	2.66
48	33.2946	108	0.927039	23.9	115	70	56.7	98	12.2	83	153	45	91	18	27	21	5.5	3.39
18	26.6728	94	0.886792	21	100	50	47.8	80	14.9	67	179	45	121	21	23		4	3.99
22	21.5924	91	0.919192	17.5	100	65	44.6	82	14.5	111	213	63	128	14	12		4.3	6.61
27	23.1915	71.3	0.727551	16.3	120	85	35.3	90	13.2	116	206	80	103	14	11	11	4.1	4.37
49	24.62	83.7	0.857582	20.5	110	78	41.4	94	12.6	327	196	37	94	21	18	28	6	5.51
42	29.8516	93	0.902913	21.5	110	60		77	15.26	70	150	41	95	16	12	15	5.4
56	37.3191	99.5	0.837542	23.4	150	85	41.3	82	14.3	74	210	76	119	21	24	35	6.2	2.39
22	27.0169	92	0.8	18.5	110	70	54.9	75	15.6	116	184	44	117	35	67		5.5	2.03
40	44.1623	107.5	0.814394	26.5	130	80	56.3	73	15.9	155	209	36	142	16	18	17	5	2.7
57	26.1438	86	0.934783	18				79	14.64	67	212	73	126	19	17	26	4.1
29	23.9062	69	0.884615	16.2	110	60	42.1	79	14.6	49	203	63	130	20	20	24	3.8	1.23
55	28.3871	99	0.916667	24	114	80		93	12.4	70		76.2		16	17	24.7	4.4	1.82
36	39.9776	116.7	0.960494	27.1	110	70		84	13.67	107	163	54	88	27	34	24	3.5
46	29.6814	101	0.94041	23.4	130	80	49.7	76	15.1	110	181	57	102		18	38	5.3	2.82
40	28.2782	94.6	0.871087	21	130	110	45.9	73	15.7	295	234	53	122	23	16	13	5.1	1.72
49	32.8814	108	0.986301	28	120	80	49	86	13.26	98	142	45	77	18	20	118	6.9	3.87
43	29.7521	104.5	0.963134	24.2	120	90		95.6667	11.9	147	214	38	147	12	11	16	5.3	3.67359
20	22.7444	74	0.74	17.3	100	60	40.2	78	14.59	94	152	54	79					8.8
61	25.5912	93.4	0.866419	19.6	120	80		87	13.08	153	187	46	110	16	17	28	4.6	2.42763
20	19.7668	68	0.715789	16.05	120	70	41.9	84	13.5	150	166	50	86	17	9		3.5	3.04
45	41.0591	124	0.96124	32	131	94		87.9	12.9	199	215	26	149	28	9	22.4		1.43442
30	44.5567	132	1.27536	33.5	140	90	67.6	94	12	112	201	66	113	86	119	197	5	1.25
46	26.5585	91.5	0.905941	20	120	80	46.5	90	12.5	127	241	52	164	17	14	34	4.6	4.59
20	23.6328	83	0.805825	16.8	110	70	44.4	76	14.8	67	167	59	95	13	12	15	3.8	6.16
47	25.4735	87.5	0.857843	18.3	110	80	41.9	71	15.8	64	162	45	104	19	18	14	3.6	2.68
27	34.2292	103	0.881849	23	124	60	58.3	74	15.1	79	163	38	109	21	32	29	6.9	6.82
53	28.0992	98.5	0.899543	23	130	92	46.7	82	13.6	129	216	63	127	16	14	13	3.8	3.33
37	32.9109	103	0.919643	24.7	110	80		86	12.89	241	178	51	79	21	21	16	4.8
53	28.0958	96	1.01053	23	160	90	42.8	90	12.3	229	222	41	135	22	16	17	6.6	3.85
49	30.7024	91	0.850467	22	121	71	47.9	80	13.8	148	214	66	118	13	17	22	4.4	7.54
35	26.4264	93	0.902913	19	100	70	43	89	12.3	101	159	48	91	16	14		2.2	3.41
28	21.0321	79.5	0.836842	16.5	90	60	48.3	84	13									2.71
38	26.2336	104	1.16854	19	120	80		88	12.4	68	209	39	156.4	23	28		2.6	2.37
35	31.6158	97	0.858407	19.5	120	90	48.2	112	9.74	131	130	51	53					2.66
51	29.1853	100	0.909091	21.7	120	80	48.4	79	13.8	109	219	59	138		17	22	5.2	5.57
36	29.6484	98	0.859649	25.5	110	80	42.3	73	14.9	177	208	54	119	19	17	37	4.9	1.7
27	29.9688	76	0.678571	18	127	83	43.5	75	14.5	96	166	63	84	20	13	62	5	2.82
43	28.9461	105	0.954545	23.5	138	86	42	89	12.2	418	219	39	96	25	38	51	2.4	1.98
40	29.5225	103.2	0.949402	21.9	110	80	46.3	87	12.46	107	246	65	160	19	25	47	3.8	3.42
29	25.3303	92	0.893204	20.5	120	80	47.3	84	12.9	116	157	22	112	14	9		3.7	2.66
44	31.3147	110	0.948276	26	112	80		77	14.06	120	182	46	112	16	12	31	3.7
59	46.655	119	0.875	32.15	130	80	60.9	85	12.7	133	220	45	148	16	20		4.9	1.5
42	30.3254	82	0.836735	22	110	80	46.8	83	13	143	271	35	207	34	57	43	5.9	3.21
19	33.6454	104.5	0.95173	23.3	112	90	49.9	81	13.3	107	158	37	100	26	36	70	6.5	9.15
20	27.3923	87	0.836538	18	100	60	41.8	81	13.3	136	204	41	136	10	10		5.4	6.58
64	31.231	99	0.838983	24.5	146	89	53.8	111	9.7	99	168	38	110	14	12	20	4.5	8.47
40	36.5015	106	0.854839	24.5	122	88	54.5	74	14.5	76	188	57	116	22	27	55	6.1	4.15
23	20.4876	75	0.806452	16.8	90	50	38	83	12.9	83	216	103	96	16	11		1.9	4.32
32	22.8104	86	0.811321	17.5	100	60	45.7	81	13.2	66	126	48	65	14	16		2.5	2.33
21	34.4841	87	0.725	22.15	140	90	56.9	92	11.6	64	159	55	91	30	37		3.2	4.2
47	35.1882	117	0.95122	26.5	120	80	51.6	75	14.2	238	246	48	150	20	26	28	5.7	1.87
22	26.2378	94	0.878505	19	110	70	43.9	85	12.5	87	196	39	140	10	6		3	3.02
36	26.7093	97	0.858407	20.1	110	70		84	12.56	80	156	48	92	17	12	8	4.7	3.43064
43	27.9172	79	0.88764	20	100	70	42.5	90	11.7	121	235	39	172	28	44	45	4.1	5.71
31	27.2874	75	0.675676	20.4	110	70	47.5	72	14.6	240	223	68	107	13	11	14	4.6	5.44
51	36.157	112	0.82963	24.5	137	87	64.8	75	14	107	206	48	137	15	10	16	3.2	5.36
30	25.6806	89	0.864078	19.3	100	70	44.7	102	10.29	156	148	36	81					4.43
46	26.1674	86	0.86	18.5	128	90	42.6	88	11.9	138	271	57	186	20	19		3.5	3.89
44	33.7945	107.5	0.990783	24.5	120	90	50.9	72	14.5	152	149	42	77	18	20	50	4.8	3.21
19	39.8828	104.2	0.837621	25.2	120	82	61.8	70	14.8	84	153	37	99	16	13	15	6.6	2.91
35	25.7515	98	0.890909	23	110	80		79	13.11	70	171	41	116	13	11	13	2.4
31	30.3019	107	0.972727	21.5	110	80	55.3	99	10.43	79	144	43	107
41	26.4629	91.5	0.863208	19.4	100	60	43.3	80	12.9	77	223	43	165	14	14	29	3.5	3.27
30	23.8803	80	0.792079	18.25	120	80	43.7	80	12.8	88	196	46	132	31	17		3.6	4.37
20	25.2976	85	0.787037	21.3	120	80	50.7	88	11.6	83	182	46	119	10	9		3	8.98
35	29.2837	92.3	0.883254	20.5	120	84	38	76	13.4	50	123	50	63	23	16	22	4.7	3.65
22	20.3856	78	0.804124	18.3	120	90	39.3	80	12.7	89	190	87	85	22	18		3.9	4.76
37	24.5852	69	0.69697	17.35	105	80	42.1	80	12.7	103	192	58	113	13	11		2.5	5.66
37	25.8824	99	0.942857	21.5	120	80	46.9	71	14.3	66	235	79	143	21	33	36	3	2.94
33	24.6	85.5	0.831712	18.8	110	70	51.7	84.42	12	129	193	52	115	14	10	30	3.2
54	26.0444	107.4	0.99907	21.7	130	70	36.4	91	11.1	232	247	50	151	16		15	3.68	2.17
61	24.2349	87.5	0.902062	18.8	110	70	43.1	88	11.4	107	189	62	106	21	17	19	4.3	3.92
38	46.624	136.8	0.966784	30.2	110	70		100	10.01	148	195	46	119	20	32		5.2
39	29.9811	103.9	0.959372	22.5	122	90	47.1	82	12.2	122	142	53	65	15	13	30	5	5.58
26	28.3423	98	0.844828	22.2	110	80		70	14.26	96	175	65	91	17	14	12	3.8
30	30.3618	88.7	0.802715	20.8	110	80	37.9	81	12.3	56	201	54	136	19	19	9	2.7	6.42
19	19.8791	65	0.684211	15.5	120	80	37.9	121	8.19	91	141	65	58					4.92
25	22.7985	76	0.783505	17	116	68	41.4	75	13.2	77	162	54	93	14	13	24	4.2	1.81
33	23.3497	82	0.824121	18.9	105	60	38.9	74	13.3	100	173	59	94	17	10	20	3	2.66
23	22.0317	75	0.773196	15.5	90	60	41	74	13.3	59	194	59	123	24	25		2.6	7.09
30	27.9649	98.5	0.895455	19.5	110	80	48.2	78	12.6	58	155	41	102	15	14	26	3.9	8.1
21	30.9829	93	0.794872	21.7	100	60	48.8	90	10.9	57	148	65	72	16	18	34	4.3	0.87
22	20.2848	74	0.778947	16.5	100	60	37.7	99	9.9	132	236	92	118	17	14		3.7	8.77
60	27.826	97	0.97	24	160	90		92	10.6	248	221	40	132	20	28	23	4.1	4.4
38	29.1693	95	0.811966	21.75	120	80	46.3	82	11.7	52	140	43	87	17	20		3.2	3.62
18	25.2926	80	0.754717	18.5	140	80	49	82	11.7	123	205	53	127	15	12		3	3.37
44	28.8341	97.1	0.916038	23.4	120	82	43.9	76	12.6	130	211	49	136	22	20	16	5.5	4.24
25	19.6194	86	0.843137	18	90	60	44.6	81	11.8	165	221	62	126	14	15		4.7	5.78
22	21.2305	63	0.623762	17	120	80	43	75	12.7	54	133	39	83	29	11	6	3.4	10.58
31	36.7271	110	0.906096	29.6	104	72	55.7	72	13.2	59	169	59	98	15	13	13	3.3	2.54
18	20.3727	70	0.714286	16.3	110	80	44.2	80	11.86	121	120	52	44					2.7
55	28.0541	100	0.980392	21.9	110	75	41	75	12.6	38	228	85	135	40	79	20	3.9	11.06
24	20.8549	61	0.663043	16.25	120	70	33.4	75	12.6	91	274	108	148	32	25		3.2	11.02
56	30.5515	99	0.891892	23.8	110	70	41.3	82	11.5		269	75		17	23	19	6.1	8.64
38	29.7521	98.5	0.875556	21.3	120	80	51.6	82	11.5	63	205	44	148	25	27		4.9	1.09
44	42.4196	119	0.929688	27.8	140	100	53.9	97	9.7	117	190	40	127	15	16	35	4.9	1.8
48	38.5665	122.5	0.995935	27.9	140	100		101	9.31	89	244	45	181	24	16	14	7.2
34	30.5969	112.5	1.03211	24.2	100	70	50.2	77	12.2	116	211	65	123	13	9	33	3.6	1.09
38	33.9446	104	0.852459	20.9	120	80	59.5	77	12.2	54	138	44	83	21	18	21	4.6	1.52
51	28.7966	92	0.836364	19.8	130	70	42.8	110	8.5									3.74
41	26.9238	100.3	1.01416	21.3	144	92	46.7	90	10.3	74	164	42	107	14	9	23	4.1	3.43
52	30.0503	97	0.92381	24.3	137	92	46.9	107	8.6	117	155	41	91	19	27	30	4.9	4.41
45	25.204	88	0.93617	19.4	120	80	37.6	84	10.9	246	178	50	79	34	64	123	4.1	4.5
26	19.2308	74	0.804348	16	90	60	32	84	10.9	106	172	52	99	15	10		3.6	3.47
32	31.6545	105.9	0.967123	24.5	110	60	46.6	70	13	126	169	44	101	23		27	7.3	1.17
20	25.8997	82	0.759259	17.3	128	86	47.2	72	12.6	149	202	63	109	13	13	9	3.8	1.84
41	29.3222	99.2	0.943863	20.2	130	70	47	80	11.3	75	199	49	135	26	23	18	3.67	2
27	36.0194	101	0.841667	23	110	70	55	86	10.5									5.47
43	23.1399	82.3	0.880214	16.3	120	70	44.3	86	10.5	55	152	52	89	16	11	20	3.02	2.36
22	25.9516	89	0.801802	18.5	100	70	55.3	77	11.7	76	116	44	57	12	10		2.5	3.02
41	23.0078	90	0.920245	21.4	110	80	40.1	85	10.58	148	244	46	168	17	11	18	4.5	1.08
49	28.8033	92	0.851852	19.5	120	80	43	89	10.1	68	201	44	143	133	183	175	4.3	4.49
39	29.2464	96	0.901408	20	110	70	48.7	84	10.7	60	154	49	93	15	15	14	3.3	3.33
37	28.7685	99.5	0.985149	21.7	120	90	51.9	91	9.87	118	180	41	115	44	79	90	5.7	2.86
47	32.6716	105	1.01942	25.3	150	90	43.5	88	10.2	105	209	56	132	27	19	39	5.4	0.83
37	36.3909	97	0.788618	21.5	110	80	49.2	76	11.8	94	205	49	137	18	10	19	3.6	1.75
47	30.3615	91	0.842593	21.4	110	80		91	9.83	59	196	73	111	21	24	14	2.7
39	27.425	92	0.910891	19.4	112	73	44.5	86	10.4	189	195	43	114	17	14	38	4.8	13.41
23	37.7229	113	0.882812	23.5	120	80	58.5	95	9.4	104	221	75	125	25	35		3.8	4.34
49	25.607	90.8	0.890196	20	132	80	44	85	10.5	118	232	76	132	14	9	19	3.6	2.31
23	25.462	88.5	0.842857	18.8	150	75	46	75	11.9	103	276	99	156	16	10		5	3.12
46	28.2822	95	0.87156	20.7	130	90		69	12.92	159	222	56	134	15	12	13	5.9
52	28	98	0.890909	22.5	120	80	49.5	97.74	9.1					20	11	12	4.3
52	27.5452	96	0.932039	21.4	120	110	43.6	86	10.3	199	270	50	180	23	25	44	5.2	5.27
22	23.6411	85	0.867347	18	90	60	43.1	75	11.8	90	154	24	112	13	12	11	3.2	3.8
29	32.281	89	0.794643	23.25	130	80	60.3	83	10.6	110	293	80	191	19	20		4.2	2.73
59	41.73	116.5	0.903101	29.8	140	90	57.3	75	11.7	73	185	43	127	16	16	15	7.2	3.22
23	25.2252	86	0.803738	19.5	120	80	53.2	79	11.1	186	178	54	87	20	10	8	4.5	3.5
21	25.5983	86	0.807512	17.5	110	70	43.8	78	11.2	117	204	76	105	10	15		4.1	5.84
65	36.4124	109	0.973214	26.5	120	80	47.4	71	12.3	239	372	56	268	27	20	24	5	2.05
18	26.6749	93	0.845455	21	112	60	54.4	75	11.6	60	135	65	58	9	15		3	6.75
61	27.9706	91	0.928571	22	146	92	39.6	106	8.2	94	182	50	113	18	18	20	4.6	8.8
20	21.3944	75	0.789474	16.7	110	60	35.5	73	11.9	114	239	71	139	14	9	13	3.4	5.58
35	40.4408	112.6	0.851096	25	112	80		97	8.91	100	169	42	107	15	19	28	5	1.9
43	35.3419	113	1.01802	25	130	90		86	10.03	278	156	29	74	14	10	20	6.9
50	45.7901	141.3	0.99507	31	130	70	60.9	81	10.6	124	262	63	174	18	21	17	3.9	3.26
20	21.8346	82	0.828283	18.5	120	80	40.4	81	10.6	51	162	66	86	15	8		4.3	2.53
25	48.4375	107	0.91453	30.8	120	90	65	80	10.7	197	206	42	125	17	12	17	5.6	2.14
18	23.56	73	0.663636	20.75	120	80	59.5	83	10.3	53	143	45	87	23	28		3.5	3.77
20	23.8487	76	0.752475	18	120	80	39.1	70	12.2	81	126	49	61	18	20		3.1	4.67
54	34.0467	106.5	1.02404	27.5	130	90	47.6	79	10.8					21	21	16		5.11
37	30.8856	96	0.979592	24.8	120	80	47.3	75	11.35	57	127	45	71	19	17	21	2.3	8.04
57	34.5401	112	1.03704	27	130	80	53.7	93	9.1	108	174	36	116		30	15	5.2	2.52
41	39.9868	123	0.938931	28.5	130	90	53.7	82	10.3	98	247	55	172	21	18	16	5.7	3.05
64	26.0218	90.5	0.887255	16.8	116	74	44.8	99	8.5	94	208	67	122	17	15	14	4.2	2.42
35	38.6659	102	0.822581	22.3	120	80	51.9	73	11.5	73	238	78	145	17	13	15	5.6	3.79
57	29.1956	91	0.875	33.5	138	85	39.2	93	9	73	177	44	119	17	14	19	5.3	1.9
29	25.4055	91	0.875	21	100	80	42	81	10.3	57	157	48	98	15	10		3.7	6.79
42	34.049	96	0.90566	22	100	70	52.3	86	9.6	70	186	46	123	13	17	22	4.3	5.63
28	29.1317	100.6	0.921245	22.7	150	100		85	9.71	86	136	38	81	17	12	14	5.1	3.35509
38	22.7219	88	0.807339	20	120	80	41.1	73	11.3	84	262	83	162	16	11	12	2.7	1.24
40	27.5915	95.6	0.877064	19.5	140	86	47.6	89	9.2	86	213	52	144	20	29	61	3.4	1.6
20	22.1687	78	0.795918	17.5	120	80	42.1	77	10.6	71	157	39	104	67	31	7	2.8	1.75
35	26.5422	94	0.918866	19.8	130	80	44.5	80	10.2	169	191	50	107	15	9	19	1.63	1.19
27	31.8	94	0.803419	19.7	120	80	50.2	89.64	9.1	69	148	43	91	20	12	9	3.3
22	21.0068	71	0.717172	16.4	90	60	42	75	10.87	118	204	60	120					4.81
56	25.1162	87	0.878788	19.5	110	70	42.4	84	9.7	177	180	44	101	28	31	28	5.9	3.28
28	27.6575	89.5	0.877451	18.4	110	80		89.3333	9.10333	90	179	61	100	33	32	57	4.6	4.264
28	26.4629	96	0.923077	26.7	120	70	41.2	76	10.68	64	114	52	49	15	10	13	3.6	2.83
37	31.7021	98	0.859649	21	130	90	57.3	75	10.8	84	191	42	132	17	13	14	5.7	3.4
47	32.4662	93	0.823009	22.25	150	90	45.9	92	8.8	116	210	56	131	20	16		4.6	6.96
51	30.6994	99.7	0.870742	23	100	72	45.8	71	11.4	118	223	58	141	19	18	13	3.1	2.55
39	39.4107	130	0.981132	25.8			59.7	93	8.7	47	151	37	105	31	27	29	4.4	2.22
19	30.1931	102	0.871795	22	120	80	54.1	77	10.5	109	228	96	110	15	11		4.9	5.34
21	23.3091	81	0.81407	16.7	120	80	42.4	72	11.2	108	166	54	90	19	11		2.7	2
18	21.7596	70	0.714286	15	93	65	46.5	78	10.3	51	185	65	110	16	4	13	4	2.71
31	27.5982	78	0.709091	19.65	110	70	58.1	73	11	151	169	44	95	15	13		4.3	2.67
40	26.5839	96	0.872727	19.5	100	70	46.9	75	10.7	195	187	36	112	17	10	10	5.3	4.14
49	31.7402	94.5	0.836283	23	110	70	44	87	9.2	61	170	62	96	18	15	24	5.2	2.49
34	27.2824	97.6	0.929524	23.5	100	70	39.6	89	8.97	100	105	46	45	13	10	13	2.9	4.41
38	24.8833	90	0.8867	20.5	100	60	45.1	76	10.5	58	203	43	148	17	10	10	3.8	2.78
19	26.3465	76	0.72381	18.55	130	70	50.3	76	10.5	50	154	61	83	17	15		3.1	9.52
28	25.1488	85	0.833333	18	110	70	51.2	76	10.5	145	215	65	121	14	10	13	4	4.66
36	26.561	87	0.782374	21	122	84	25.5	79	10.1	75	187	60	112	19	17	17	4.8	3.2
23	28.3039	82	0.759259	20.75	130	80	46.4	73	10.9	111	214	56	136	34	29		4.8	6.84
25	22.2266	64	0.646465	18.25	110	80	42.2	78	10.2	50	161	63	88	21	22		3.9	1.69
38	31.0169	106.3	0.949107	23	122	80	31.4	77	10.3	92	192	54	120	15	15	16	4	2.51
32	19.1001	60	0.625	17.5	117	77	43.7	80	9.9	69	139	51	74	17	9	19	3.6	6.21
55	24.3418	58	0.591837	20	138	80	37.4	85	9.3	152	227	67	130	15	24	72	6	3.4
38	25.0758	80.5	0.856383	19.7	110	70	41.3	90	8.76	104	152	39	92	18	23	15	4.3	3.42
23	25.204	80	0.761905	17	110	60	42.5	90	8.7	103	226	60	145	18	20		4.2	7.79
19	26.9111	96	0.857143	20	95	60	48.9	76	10.3	81	131	48	67	14	10		3.5	4.6
48	26.9017	92	0.92	21	110	70	41.2	91	8.6	143	216	30	157	33	33	24	5.3	2.93
18	19.7742	63	0.692308	15.45	120	80	43.1	93	8.4	43	144	50	85	16	16		3.1	2.83
18	20.3954	70	0.714286	15	107	70	34.2	100	7.78	125	158	47	86					3.8
54	26.1564	99	0.980198	22.8	140	100	42	81	9.6	120	208	42	142	14	12	11	5.3	3.39
49	35.6796	106	0.950673	22.9	130	80	45.5	105	7.4	144	248	59	160	22	19	23	4
23	23.3275	82	0.845361	18	120	80	37.7	98	7.91	158	120	46	42					3.33
20	25.58	98	0.951456	19.5	90	60	47.6	89	8.7	112	183	71	90	20	9		5.5	2.97
52	22.2471	88.6	0.862707	19.3	142	90	41.5	79	9.8	131	271	53	192	16	9	11	3	3.82
38	25.6824	99	0.92093	21	120	80	48.4	84	9.2	139	245	57	160	23	18	20	3.5	1.86
18	18.662	76	0.835165	15	110	60	37.7	74	10.4	147	180	46	105	15	5		5	9.39
41	27.3967	86	0.811321	18	130	90	44.5	80	9.6	61	190	56	122	19	20	27	3.1	3.47
27	36.8442	112.5	0.852273	27.8	110	70		70	10.96	64	187	40	134	14	12	17	4.1
32	23.2869	71	0.696078	15.3	120	65	45.6	85	9	90	156	60	78	11	9	18	4.3	2.06
65	36.3573	102	0.816	22	120	90		92	8.27	82	184	60	108	17	16	29	4.3
50	36.4523	111	0.880952	17	120	80	55.5	104	7.3	70	199	35	150	19	25	17		1.61
29	26.8785	83	0.834171	19	110	80	42.9	79	9.6	76	215	79	121	16	9	8	3.4	5.06
35	25.9695	77.5	0.815789	19	120	90	40.5	87	8.7	76	163	50	98	12	8		3.6	7.1
47	29.0437	87	0.828571	22.35	130	80	52.4	91	8.3	103	229	47	161	13	8		5.3	1.16
29	35.4492	100	0.862069	25	104	70	54.6	92	8.2	153	168	33	105	15	15	18	4.5
39	25.157	84.8	0.878756	18	140	60	43.8	80	9.4	152	170	45	95	15	14	27	4.8	1.52
21	21.7697	78	0.80829	16	110	82	42.3	80	9.4	42	142	49	85	18	17	21	3.8	4.16
28	25.2098	69	0.775281	18	120	70	41.3	77	9.7	61	137	47	78	15	8	16	3.6	5.02
29	24.4141	84.3	0.802857	15	120	80		95.6667	7.8	43	164	71	84	25	13	14	4.5	4.48
49	25.4366	88	0.875622	19.8	104	70	39.6	76	9.8	97	208	63	126	11	15	12	2.6	1.65
21	25.1998	83	0.775701	17.4	102	64	47.3	94	7.9	83	156	60	79	23	22		3.8	13.76
38	21.175	81	0.861702	19.3	120	80		68	10.92	54	125	47	67	13	11	18	2.8
55	28.2407	102	0.980769	23.2	120	80	42.1	87	8.5	100	99	45	47	18	20	21	3.6	5.48
29	24.2972	91.2	0.907463	19.5	100	60	36.8	77	9.6	81	196	63	117	20	15	10	4.2	3.63
20	20.7185	71	0.763441	15.5	100	56	37.4	119	6.21	109	139	45	72					3.7
21	19.1406	81	0.861702	16.5	120	80	33.9	80	9.2	71	155	46	95	20	23		3.7	5.95
19	22.9544	78	0.787879	17.5	100	60	40	69	10.6	87	141	40	84	15	10		3	4.07
33	22.1893	67	0.712766	16.85	120	80	41.5	72	10.1	220	234	86	104	14	11		2.6	10.58
18	21.7373	72.5	0.771277	15.5	123	83	41.1	79	9.2	123	181	62	94	26	47		3.4	4.73
35	24.729	95.5	0.892523	20	100	60	43.3	73	9.9	189	165	54	73	12	8	7	3.2	1.86
29	27.8866	96.5	0.889401	21	100	60	48.2	83	8.7	143	235	34	172	18	16	46	5	1.88
21	20.6396	73	0.744898	18.5	100	70	40.7	83	8.7	99	197	67	110	20	16		4.3	4.38
48	32.039	99	0.916667	24	140	100	45	72	10	200	234	42	152	40	45	60	5.4	8.2
45	33.5616	103	0.85124	21	125	70	57.4	80	9	65	169	38	118	15	11	15	5.6	10.67
64	33.7549	106	0.890756	25.5	130	80	50.3	92	7.8	177	127	36	56	20	20	29	5.8	5.45
41	29.9023	91.2	0.847584	18.6	140	85	47.7	83	8.6	146	199	46	124	22	17	16	2.8	5.02
28	22.1003	70	0.729167	16.25	110	70	41.9	80	8.9	126	221	82	114	12	11		4.3	8.09
18	18.9807	58	0.651685	14.05	130	70	38.6	69	10.3	33	127	39	81	26	25		3.5	5.46
23	27.4844	87	0.836538	18.8	100	70	42	78	9.1	89	218	82	118	24	15	19	4.4	8.54
30	23.6013	76	0.783505	18.3	130	90	21.5	80	8.8	128	250	117	107	28	17		2.7	13.76
32	32.1979	101	0.808	24	132	88	568	78	9	53	129	36	83	13	10	24	3.9	2.35
23	31.432	93.5	0.799145	23	116	66	53.4	90	7.8	69	175	46	115	15	19	19	4.3	2.42
20	22.2908	82	0.82	16.5	110	60	43.6	70	10	114	164	47	94	8	5		2.5	6.57
44	36.7089	100	0.854701	24.5	136	96	49.6	82	8.5	88	185	43	124	17	19	82	5.5	1.38
33	33.2415	105	0.853659	24.5	110	70	53.8	81	8.6	70	144	50	80	19	18		4.7	3.86
57	31.6612	109	0.923729	23.3	130	90	51.2	94	7.4	214	207	37	127	21	21	13	6	6.55
49	25.8824	96.5	0.893519	21	90	60	49.6	73	9.5	126	197	52	120	20	15	25	3	1.86
22	21.7685	80	0.808081	16.2	110	72	53.3	76	9.07	99	135	51	64	15	11		2.9	6.64
38	22.5598	77	0.850829	18.5	120	80	37	71	9.7	197	206	34	133	22	19	25	4	3.51
56	29.5159	99	0.908257	22.5	114	86	43.1	80	8.6	73	159	43	101	17	24	32	2.7	2.28
31	21.5329	79	0.849462	17	100	70	53.2	78	8.8	98	152	55	77					2.31
42	26.7185	92	0.910891	18.6	110	70	44.8	75	9.14	84	200	70	113	18	13	12	2.3	5.61
45	20.8953	79.2	0.859002	18.6	110	80	39.4	89	7.7	135	220	49	144	14		16	6	2.34
20	22.8545	75	0.757576	16.5	125	80	37	76	9	120	164	52	88	14	12		4	4.61
33	33.187	107.2	0.963163	25.1	120	80	52.5	72	9.48	85	228	62	149	19	18	24	4.2	5.44
48	24.1322	86	0.843137	20	100	70	41.3	74	9.2	101	200	56	124	16	9	24	4.3	2.85
30	23.9334	80	0.776699	17.8	110	80	38.8	81	8.4	105	178	61	96	13	8	9	5	2.14
34	25.8876	74	0.747475	19.35	120	80	44.2	78	8.7	53	210	45	154	23	20		4.8	3.8
27	28.2907	91	0.784483	20.5	123	80	51.5	82	8.26	198	161	52	69					6.04
19	28.4414	80	0.720721	21.55	120	80	55.9	82	8.2	39	117	46	63	21	14		3.8	3.46
30	45.2893	130	0.878378	30.5	130	90		73	9.21	56	152	44	97	18	24	29	3.7
53	33.7604	119	0.983471	26.2	120	80	48.5	112	6	132	198	32	140	18	23	27	4.8	1.97
47	26.578	85.6	0.826255	18.4	112	72	43.6	85	7.9	56	126	46	69	14	11	15	4.4	18.93
31	22.1916	73	0.752577	15	110	68	40.8	78	8.6	55	116	44	61	16	10	10	3.3	2.26
25	25.1486	82	0.796117	18.5	100	80	43	73	9.1	91	160	37	105	11	15	27	2.2	1.78
56	25.6789	87	0.878788	20.6	135	95	39.6	81	8.2	64	214	61	140	18	20	14	4.2	7.54
25	24.2475	85	0.825243	18.3	117	70	42.8	79	8.4	191	434	54	342	17	14		5.1	5.05
21	33.9768	102	0.894737	24.5	118	80	49.9	75	8.8	67	172	54	105	17	14		6.2	1.55
31	25.9574	90	0.909091	19.4	110	80		68.3333	9.64667	99	109	40	49	17	17	19	2.9	3.68562
43	20.2289	80.6	0.869471	14.9	120	80	35.8	89	7.4	104	170	53	96.2	21	16	23	4.3	2.47
35	27.6095	95	0.863636	22.8	110	70	53.1	72	9.14	144	186	42	115	13	10	14	4	4.2
33	26.1865	86	0.868687	17.5	110	70	40.8	81	8.12	70	144	34	96	26	18	15	4.3	1.82
38	23.4738	80	0.860215	15.9	120	80	35.5	87	7.56	89	110	56	46	12	10	12	4.2	1.78
55	29.5626	95	0.833333	22	167	102	55.5	98	6.7	74	220	56	150	36	33	19	3.9	3.08
30	26.9014	92	0.87619	19.2	124	83	47.6	83	7.9	91	214	49	147	15	20	26	4	8.78
54	28.4293	89	0.881188	19	110	60	37.5	83	7.9	147	247	50	168	18	17	14	4.8	3.49
20	20.223	69	0.726316	15.8	100	60	41.6	69	9.5	146	157	62	66	16	10		3.5	9.92
40	31.702	110	0.932203	27.5	112	80		76	8.61	194	266	66	161	15	21	27	3.8
50	24.275	82	0.811881	17.5	100	60	40.6	71	9.2	59	152	58	82	17	16	10	3.5	4.17
31	27.8159	93	0.807292	21	110	75	47.4	73	8.9	62	151	69	70	19	17		5.6	4.69
35	22.9531	86	0.890269	19.7	140	90	42	89	7.3	99	174	53	101	30	50		4.1	4.58
32	25.8773	88	0.854369	20	110	80	46.1	71	9.14	144	186	42	115	13	10	14	4	2.54
21	24.5319	92	0.884615	18.5	120	80	47.8	72	9	74	161	60	86	12	18		3.5	5.32
18	20.1674	67	0.690722	18.4	110	70	44.4	96	6.75	118	220	60	136					2.14
21	23.0112	63	0.63	16.7	120	70	42.8	84	7.7	59	113	40	61	11	12		3.4	3.3
51	21.8549	81	0.870968	21	215	119	46.5	98	6.6	278	239	42	142	18	17	28	4.3	2.9
30	27.1041	87	0.878788	20	110	80	38.3	71	9.1	99	154	39	95	17	13	23	4	2.37
50	34.0199	112	0.896	24.5	140	100	55.3	76	8.5	287	244	41	146	17	18	26	3.9	1.73
25	27.8307	97	0.94358	23	110	80	47.8	67	9.63	98	112	54	45	12	11	11	3.4	3.17
23	21.5619	71.5	0.763074	15.3	120	92	37.2	75	8.6	43	135	48	78	13	12			2.93
53	25.2274	89	0.855769	15.5			44.4	81	7.9	72	189	35	140	21	17	12	3.5	11.58
19	20.1631	72.5	0.767196	16.5	96	62	38.8	83	7.7	120	199	58	117	14	7	9	4.1
57	22.2222	85.5	0.960674	20.2	100	80	33	84	7.6	128	185	46	113.4			21	4.2	3.25
31	23.815	89.5	0.852381	16.2	100	65	44.1	84	7.6	78	176	51	109	21	13		2.9	3.75
19	20.2538	84	0.865979	16	110	70	39.2	75	8.5	140	183	66	89	28	33		3.3	2.1
57	21.9206	74.1	0.788298	15.5	122	100	36.1	85	7.5	68	167	51	102	21	25			9.97
48	38.0859	115	0.938776	26	130	80	55.5	87	7.3	138	240	48	164	18	20	17	4.8	2.67
24	25.204	88	0.888889	18	120	80	41.9	87	7.3	61	160	45	103	17	15		3.6	2.53
36	27.7686	91	0.858491	20.25	125	85	50.8	78	8.1	76	185	54	116	19	31		4	9.87
31	23.8918	83	0.846939	15.5	114	74	40.1	81	7.8	139	205	50	127	18	33	23	4.1	1.34
46	27.8245	98.5	0.881038	21	110	70	49.7	77	8.2	110	234	48	164	15	11		3.2	1.89
20	19.9594	81	0.835052	16	105	70	41.6	76	8.3	58	167	61	94	31	26		4.9	6.02
20	21.0715	66	0.6875	15.9	110	70	43.7	70	9	134	199	49	123	15	15		3.7	4.64
59	27.4298	90	0.882353	21	120	90	46.1	98	6.4	195	232	43	150	21	19	18	3.7	2.89
38	22.0143	87	0.852941	19.8	112	80	46.3	71	8.8	64	165	48	104	16	13	25	3.6	3.02
21	19.3057	70	0.804598	15	122	80	38.1	78	8	38	155	75	72	15	11	24	3.8	2.58
47	33.6663	92.5	0.74	21	110	70	51.4	77	8.1	62	248	57	179	22	26	25	5.3	5.08
53	24.6111	94	1.01075	18.9	130	100	35	77	8.1	209	284	57	185	18	21		4	2.27
24	26.1069	87.5	0.857843	18.5	108	69	45.5	77	8.1	91	236	62	156	17	15	26	4.9	1.9
24	23.0146	80	0.761905	17.8	110	70	47.2	77	8.1	115	189	68	98	12	9		4.2	5.13
38	33.0016	115.5	0.946721	25.5	130	85	56	82	7.6	167	187	43	111	14	18	30	3.4	1.7
25	23.7542	78	0.742857	16.5	102	75	41.7	76	8.2	31	110			20	10		7.2	8.43
27	20.9647	73.5	0.773684	14.9	120	80	42.3	76	8.2	118	214	65	125	19	14	16	4.7	9.13
21	20.4082	78	0.829787	14.5	100	70	38.1	73	8.5	61	142	49	81	19	28		3.2	2.09
33	30.4063	103	0.919643	23	130	90	52.3	72	8.6	79	162	54	92	18	13	12	4	7.36
38	23.1	89.5	0.840376	18.8	110	70	46	72.54	8.5	111	226	65	139	19	8	8	3.3
21	22.8175	81	0.81	18.8	110	60	48.7	79	7.8	76	175	60	100	12	9	11	3.3	6.71
52	27.5749	87	0.87	17.3	120	80	39.1	77	8	373	227	50	102	18	12	24	4.4	2.6
49	24.6094	80.5	0.805	28	118	84	41.2	83	7.4	102	245	68	157	18	11	12	4.4	4.38
35	27.8539	92.5	0.860465	21.8	120	90	45.5	84	7.3	124	172	32	115	26	44	30	3	5.5
46	24.6875	80	0.816327	18				81	7.56	56	202	53	138	15	11	28	3.5
23	47.6891	150	0.967742	27	130	90	68.6	86	7.1	155	219	53	135	17	27	36	6.2
32	24.649	83	0.798077	18.3	110	70	48.3	84	7.25	99	147	36	91	15	14	19	3.9	4.09
22	20.8117	70	0.752688	14.5	100	60	38.1	92	6.6	62	169	63	94	14	9		4.4	3.77
31	32.8378	96.8	0.81072	24.8	122	70	51.3	74	8.2	93	165	44	102	13	15	23	4.1	1.23
25	27.4719	94	0.806175	19.7	110	80	50.1	73	8.3	156	207	70	106	13	11	11	4.2	1.92
19	32.1124	96	0.780488	23.35	120	70	60.8	89	6.8	68	137	59	64	11	18		3.6	8.8
56	27.8058	81	0.764151	20.2	120	90	39.1	86	7.03	46	164	45	110	17	4	14	3.1	2.24
53	24.6904	91	0.919192	20	107	80	43.8	102	5.9	111	195	49	124	22	20	30	4.4	2.27
21	19.1351	75	0.824176	15.5	110	70	38.2	82	7.3	46	155	56	90	16	9		3.5	2.84
48	27.1926	93	0.885714	21.7	110	80	45.3	92	6.5	114							4.6	2.83
39	25.0657	93	0.939394	20.5	119	77	41.5	83	7.2	105	152	35	96	21	21	24	3.7	3.31
33	45.9473	132	0.916667	29.3	130	90	62.6	76	7.8	71	175	48	113	21	17	47	5.1	2.42
28	34.4753	103	0.830645	23.9	140	80	58.6	76	7.8	107	180	50	109	23	24	25	4	2.75
50	27.5136	89	0.851675	17.5	178	110	39.1	78	7.6	160	238	61	145	19	11	14	3.5	3.57
40	25.7439	96.1	0.886531	19.4	100	70	54	80	7.4	95	176	47	110	12	11	22	3.5	6.94
30	22.6843	79.3	0.803445	20.9	130	80	39.3	81	7.3	52	156	72	74	17	17	28	2.4	6.45
30	48.3995	128	0.870748	30	140	100	62.3	72	8.2	100	184	47	117	18	25	21	5.6	1.14
34	25.503	84.5	0.868448	18.9	110	70		87.6667	6.72333	56	127	36	80	17	20	18	3.2	3.01023
22	22.0517	86	0.86	17.5	110	70	46.7	83	7.1	72	212	57	141	19	15		3.2	2.13
24	23.9062	86.5	0.856436	17.7	120	85	41.4	74	7.9	65	168	62	93	19	15	17	4.5	10.4
27	28.5216	109.5	0.977679	23.2	90	60	49	80	7.3	83	153	35	101	17	23	15	4.9	3.3
50	35.6641	117.5	0.983264	28.3	125	80	54.4	72	8.1	364	315	60	182	16	9		6.9	2.78
37	26.8181	93	0.869159	21	100	60	51.5	84	6.9	91	190	64	108	17	12		3.2	4.8
22	23.931	83	0.83	17	105	65	44.5	69	8.4	64	127	46	68	15	10		4	3.59
54	29.2094	100.5	0.932282	23	124	86	37.3	76	7.6	136	199	45	127	19	15	33	4.1	3.26
34	23.4755	82.6	0.812992	17.7	122	90	37.2	76	7.6	47	157	51	97	16	12	35	3.2	4.62
22	21.9518	83.3	0.804831	16.4	120	80	43.9	76	7.6	56	184	46	127	12	9	11	4	5.5
22	26.1176	75	0.700935	17.5	120	70	43.8	75	7.7	100	182	46	116	10	9		4	6.53
19	27.6254	101	0.961905	20.5	105	70	50.8	74	7.8	60	148	36	100	20	13		4.5	5.96
51	26.9141	94	0.903846	21	110	100		70	8.24	75	218	49	154	15	12	12
21	23.7332	78	0.764706	16.5	100	60	41.1	80	7.2	57	203	53	139	13	9		2	4.93
18	21.5019	80	0.833333	16.5	100	60	38.7	72	8	99	176	43	114	10	8		3.5	3.78
35	29.4808	103	0.990385	22.5	120	80	55.1	81	7.1	110	163	49	92	19	11	14	4.6	3.06
21	24.6711	68	0.723404	17.45	100	60	41.3	69	8.3	61	121	46	63	14	5		3.7	5.02
57	23.8281	90.5	0.947644	18.4	104	64	40.7	110	5.2	179	223	41	146	22	23	17	4.2	4.65
20	21.2936	83	0.873684	16	115	75	39.4	84	6.8	79	154	78	60	15	5		3	2.9
31	19.4381	74.5	0.861272	15.5	110	70	31.5	77	7.4	68	183	47	122	21	21	24	3.4	3.59
36	28.4375	92.9	0.89499	19.9	110	70		93.3333	6.10333	78	145	49	80	23	14	14	3.9	4.61671
46	34.2738	105	0.945946	26	122	68		78	7.3	153	184	29	125	13	15	34	5.3	2.77
33	22.5956	80	0.833333	18	90	70	39.9	73	7.8	78	134	52	52	18	10	41	7.1	2.71
23	23.7253	81	0.81	15.5	120	80	39	71	8	98	170	54	97	13	7		3	1.76
23	19.6852	80	0.833333	16	110	70	40.9	69	8.2	108	154	46	86	16	12		3	4.43
52	33.0876	113	1.01802	28	173	106	59.7	101	5.6	267	162	41	68	23	27		4.5	2.47
40	20.4491	67	0.712766	15.65	110	80	37.5	94	6	63	209	93	103	26	27		3.6	5.44
29	31.7662	110	0.973451	24.6	110	70	49.5	97	5.8	90	186	55	113	25	30	51	4	7.4
53	26.4308	93.5	0.921182	21	110	80	37.4	76	7.4	98	190	43	127	26	49	81	4.5	4.17
45	22.6757	79.1	0.821391	15.1	110	70	34	78	7.2	146	188	50	109	20	18	34		3.38
25	21.1412	78.8	0.820833	18.1	120	90	41.5	71	7.9	129	163	41	96	17	13	12	3.8	5.85
31	26.6406	92	0.848708	19.1	110	65		99	5.63	144	200	42	102	18	15	10	3.7	5.38779
21	22.3183	76	0.745098	18.6	120	80	47.3	74	7.5	69	128	43	71	9	10		3	6.37
31	27.6135	90	0.823422	18.9	120	83	50.6	76	7.3	136	284	59	198	19	19	18	4.9	2.3
47	28.5417	91	0.850467	20	120	90	47.6	97	5.71	103	129	53	55					1.8
34	30.2215	102	0.93578	22.5	100	90	37.2	85	6.5	72	145	45	86	17	12	15	3.2	5.83
25	19.503	70.5	0.742105	14.3	111	70	40	75	7.3	112	205	94	89	17	14	18	4.1	8.64
27	22.7273	81	0.81	16	100	70	55.4	77	7.11	67	136	45	78	21	19	6	2.1
47	24.0625	84	0.831683	17.6	99	66	42.1	96	5.7	77	206	44	147	20	22	22	5.6	3.88
20	19.3187	74	0.787234	16.7	100	60	40.4	84	6.5	85	170	66	87	19	17		3.6	7.65
28	31.3291	104.3	0.876471	22	100	70	42.7	85	6.4	81	178	43	119	17	14	21	4.8	1.04
51	32.5855	103	0.880342	23.8	160	100	46.1	81	6.7	102	242	54	168	16	19		4.1	5.31
46	27.1183	52	0.565217	20	125	80	40.3	106	5.1	180	181	39	106	18	18		3.7	4.16
53	21.1073	78	0.804124	19.5			45.2	90	6	43	170	44	118	15	12	14	3.4	3.7
43	31.25	97	0.881818	20.7	127	83	54.1	81	6.6	82	216	66	134	18	18	43	4.6	7.23
37	27.6172	98.3	0.924741	22.5	120	70	47.6	69	7.74	83	163	51	95	22	19	14	3.6	9.91
41	24.589	93	0.853211	22	100	60	48.3	82	6.5	83	232	56	159	15	16	59	3.3	2.16
34	22.984	62	0.563636	18.5	113	70	46.7	72	7.4	117	161	69	69	18	7	22	4	1.27
25	25.0692	88	0.830189	20	100	60	48	75	7.1	88	175	61	96	13	9	10	5.1	11.4
37	22.7235	68.8	0.637037	17	110	70	41.7	78	6.8	125	208	63	120	20	14	21	3.7	4.13
18	20.0777	76	0.817204	15	100	70	33.3	84	6.3	52	163	40	113	19	14		4.4	3.73
41	31.0926	99	1	21.7	126	80	44.6	85	6.2	78	171	46	109	20	13	14	2.9	1.85
41	27.7391	99	0.908257	21.3	130	80	50.1	75	7	83	188	63	108	17	14		4.1	4.13
40	21.3345	82	0.854167	18	100	50	33.3	76	6.9	49	198	66	122	17	11	12	3.8	5.41
46	26.7752	87.5	0.849515	18.5	110	60	41.8	77	6.8	164	266	49	184	24	22	22	5.6	2.54
59	31.8681	104	0.954128	22.7	130	80	46.1	78	6.7	44	179	83	87	19	24	13	4	8.12
49	29.0579	96	0.880734	22	140	90	43.9	79	6.6	123	194	35	134	20	12	15	6.4	4.17
57	32.3884	98	0.816667	19.5	120	80	52.4	121	4.3	101	204	62	138	38	32	76	4.8	1.73
48	22.71	84.5	0.864893	17	140	90	40.6	69	7.54	108	206	72	112	20	20	12	3.4	3.44
43	25.2454	68	0.957746	18.25	116	76	43.7	80	6.5	119	205	75	106	11	9		4.7	2.78
18	23.2304	78	0.787879	15.3	131	87	46.3	82	6.3	54	160	56	93	19	12	11	4.6	3.65
46	30.1098	101.2	0.937037	22.4	112	80	42.6	77	6.7	118	234	65	145	17	16	38	3.4	10.24
20	28.0778	81	0.736364	20.6	115	75	50.8	77	6.7	58	158	57	89	14	15	24	3.9	6.22
59	23.7399	85.6	0.910638	16.2	130	84	36.4	77	6.7	130	172	40	106	16	11	12	3.5	3.25
19	20.9766	78	0.821053	16.5	100	55	40.5	70	7.3	110	141	34	85	15	10		3.5	2.78
18	22.9421	83	0.873684	16.5	174	84	42.9	76	6.7	41	118	45	65	23	19		4.7	10.6
52	23.7253	60	0.612245	17.5	113	57	39	82	6.2	127	202	63	114	18	15	15	4.4	6.02
55	27.2392	100	0.980392	23	130	90	42.5	89	5.7	98	257	52	185	18	13	13	5.6	1.11
29	22.6172	73.5	0.742424	16	100	80	40.2	78	6.5	68	150	45	91	20	19	10	2.5	4.57
46	25.7506	88	0.838095	19.3	120	80	42.9	79	6.4	96	189	54	116	19	21	26	3.7	1.6
55	21.1026	83.6	0.878151	19.2	100	60	37.7	79	6.4	72	205	46	144	25	13		3.6	2.66
22	19.4964	72	0.782609	16.5	110	70	39.3	81	6.22	140	196	71	97					5.2
23	22.5274	79.3	0.813333	15.8	120	64	42.2	74	6.8	87	172	60	95	22	24	17	3.5	6.61
54	27.8	101	0.935185	22.2	100	70	40.2	75	6.7	131	222	53	143	29	30	19	3.5	9.89
19	19.8681	78	0.8125	16.2	100	60	39.7	75	6.7	51	135	60	65	16	11		3.8	8.37
30	22.6	69.5	0.709184	14.7	90	60	35.7	77.22	6.5	42	140	58	74	11	8	13	2.6
37	25.1077	95	0.896226	20	100	70	45.4	78	6.4	143	250	57	164	16	20	27	6.2	4.59
51	33.6793	107.9	0.959111	24.9	110	80	51.3	86	5.8	73	222	47	160	22		26	4.58	3.99
39	34.5429	112	0.842105	25	140	100	63.6	72	6.9	63	169	59	97	16	13	9		2.52
59	22.7233	71	0.739583	17.5	120	80	33.6	80	6.2	60	220	73	135	18	16	14	2.9	5.53
47	28.3455	97	0.989796	21.3	118	88	42.4	87	5.7	64	144	43	88	17	15	22	3.8	6.16
37	29.0167	92	0.888889	21.7	110	78	50.1	84	5.9	162	246	38	176	21	26	25	5.6	4.38
18	20.2913	73.5	0.781915	15	100	60	37.1	84	5.9	35	120	60	53	16	8		3.1	6.3
42	24.8777	87	0.896907	19.25	110	70	43.7	99	5	74	147	43	89	15	20		3	10.4
20	24.18	85	0.772727	18.5	92	60	53.9	66	7.5	62	188	59	117	19	15		3	3.97
43	29.7442	104.5	0.930543	20.9	130	90		76.6667	6.45	66	144	60	71	17	19	17	4.7	1.70012
55	29.3	93	0.894231	18.2	120	80	46.4	77.04	6.4	142	226	38	160	17	27	19	4
52	27.2545	93	0.898551	19.5	100	80	41.5	93	5.3	167	206	45	128	19	14	33	4.1	8.94
32	20.5496	63	0.768293	17	110	80	36	77	6.4	48	145	55	80	13	10	11	4.7	8.35
63	35.0862	115.1	0.95124	25	140	100	44	78	6.3	153	227	53	143	19	16	14	4.9	5.02
20	27.7211	80	0.733945	18.5	100	70	44.4	78	6.3	90	184	61	105	4	5		4.5	1.58
21	26.0978	77	0.719626	17.5	100	60	44	77	6.3	43	143	50	84	15	10		4.1	9.5
30	31.8047	96	0.911681	25.5	120	70	63.5	73	6.63	113	190	36	131	23	11	7	5.9	1.83
51	32.4	95	0.87963	20.1	120	80	39.4	84.78	5.7	82	238	60	162	19	13	7	4.5
36	35.8494	111	0.909836	25.5	110	80		80	6.03	89	135	33	84	14	20	15	4.4
35	23.5304	87	0.915789	18	100	65	42.9	74	6.5	83	226	50	159	16	16		3.8	1.77
22	22.0312	78	0.764706	15.5	100	60	43.2	80	6	116	136	56	57	9	9		4	2.45
23	23.7332	84	0.831683	16	100	60	42.9	81	5.9	58	155	45	98	16	11		3.1	4.65
64	23.6661	90	0.957447	19	140	90	35.4	90	5.3	88	247	70	159	21	16	32	2.8	4.49
21	30.4687	78	0.696429	17.75	120	80	70.5	82	5.8	74	184	54	115	20	14		3.9	1.44
21	22.8516	80.5	0.781553	17.1	130	75	40.1	76	6.2	116	231	69	139	15	7	11	4.3	8.37
26	24.5153	82	0.811881	16.5	120	80	44.2	76	6.2	42	144	65	71	18	15	11	3.7	3.19
46	23.7483	79	0.759615	17.1	90	70	40.1	71	6.6	105	226	68	137	17	16	14	3.9	2.43
50	25.0204	69	0.884615	21	120	70	40.4	72	6.5	87	207	48	142	18	17	20	4.4	2.89
37	24.3551	88.5	0.854247	19.3	110	80	42.1	72	6.48	115	214	88	103	15	12	17	18	5.45
44	34.1553	106	0.861789	24.9	110	80		71	6.57	97	148	40	89	13	8	11	3.6
39	25.3415	86	0.873096	19.1	120	70	41.5	79	5.9	75	140	43	82	20	21	27	2.6	3.82
53	26.4915	93	0.853211	19.8	120	80	48.8	93	5	58	227	65	150	20	17		5.2	4.62
55	19.2508	66	0.725275	13.5	100	70	36.1	80	5.8	59	140	47	81	12	15	23	3.9	7.43
36	25.721	89.5	0.901309	17.3	111	70		67	6.91	84	164	41	106	20	21	70	3.7	3.041
24	19.1467	52	0.597701	14.6	107	63	31.8	67	6.9	100	215	66	129	21	14	51	4.2
44	33.0346	97	0.946341	20.7	100	70	50.7	72	6.4	87	186	54	115	25	48	20	6.1	3.21
49	26.7737	90	0.87668	21	110	60	46.9	96	4.8	55	179	51	117	20		27	3.2	3.49
18	26.3465	94	0.878505	19	105	60	52.4	78	5.9	55	152	60	81	15	12		3.3	4.39
34	27.6262	94	0.862385	21	120	90	45.3	74	6.2	134	216	48	141	20	21	36	4	4.36
47	25.3945	84	0.857143	17.5	130	80	42	74	6.2	86	160	59	84	19	16	10	3.5	2.22
40	26.7857	95	0.88785	22	100	70	50.7	79	5.8	74	182	30	137	15	9	8	3.9	3.43
30	24.3046	85	0.854271	17	120	80		80	5.70333	66	187	54	120	16	13	14	3.8	3.90515
30	27.0769	96	0.872727	18.7	120	80	50.4	71	6.4	109	189	50	117	14	15	19	4.4	4.75
46	39.3842	114	0.923077	26.4	140	90	46.3	77	5.9	114	199	45	131	15	13	17	4	1.71
24	18.5809	68	0.781609	14.3	90	50	35.2	84	5.4	78	139	66	57	13	15	13	3.3	8.46
20	20.8026	79.9	0.812818	14.8	110	63	47	72	6.3	51	198	59	129	19	18	16	3.6	3.83
18	25.5078	67	0.676768	18.45	120	70	43	87	5.2	62	221	86	123	28	34		5	2.28
44	26.4844	94	0.866359	21	100	70	41.3	74	6.1	107	177	60	96	24	20	28	4.2	7.79
39	32.2526	98	0.915888	23	100	70		70	6.41	77	168	53	100	18	13	22	4.2
51	28.1531	88.8	0.814679	18.6	130	95	45.6	77	5.8	95	179	50	110	19	18	9	5.7	3.6
29	25.0391	72	0.72	17.4	120	60	48.4	77	5.8	81	201	51	134	18	16	17	3	5.25
45	29.7749	101	0.935185	22.6	107	73	43.8	89	5	122	215	40	151	21	15	26	4	5.57
57	25.5923	86	0.803738	19	110	70	38.2	75	5.9	123	166	59	82	21	15	10	5.1	2.7
29	21.0636	73	0.793478	15.5	120	80	36.3	75	5.9	74	186	54	117	17	16	15	3.9	1.27
53	24.6385	84.5	0.868448	18.1	120	80	37	105	4.2	93	231	55	157	18	17	31	4.8	3.44
27	21.8879	74	0.755102	16	100	70	52	76	5.8	46	169	71	89	15	13	9	2.4	10.16
54	23.8728	84.4	0.848241	17.5	110	65	37.1	71	6.2	156	218	36	151	16	10	22	4.2	2.88
28	34.9656	118.5	0.995798	25	110	80	55.4	83	5.3	76	119	34	70	17	12	17	3.5	1.17
24	25.0323	88.2	0.781915	17.8	120	74	52.3	72	6.1	87	192	89	86	29	14	10	4.5	2.04
35	19.6	79	0.831579	15.4	100	60	35.7	78.3	5.6	62	162	74	76	14	11	10	3.8
24	27.5506	98	0.890909	24.8	110	60	46.8	89	4.9	69	168	43	111	50	29	23	4.6	2.04
44	29.2638	102	0.962264	22	130	100	49.8	75	5.8	55	174	52	111	17	10	25	3.6	2.96
56	24.2907	86	0.924731	19	130	90	39.3	92	4.7	92	171	78	75	26	27	123	4.4	1.25
19	19.1742	69	0.775281	14.5	100	60	30.9	80	5.4	54	146	58	77	15	10		3	6.16
21	19.6059	78	0.876404	13	110	80	34.7	72	6	83	160	60	83	16	11	17	4.1	7.27
36	28.056	97.5	0.928571	21.8	110	80	50.5	77	5.6	93	213	66	128	25	17	17	3.7	6.92
22	19.598	69	0.734043	15.5	110	70	36.3	81	5.3	112	176	68	86	14	9		3.5	4.02
54	28.4293	93	0.939394	22	130	73	40.6	68	6.3	105	240	48	174			18	2.2	2.15
22	19.8173	66.5	0.718919	14.5	100	60	36.3	71	6	57	131	56	64	18	10	14	3.9	11
37	22.1201	91.5	0.915	19	120	80	48.9	85	5	75	200	60	125	16	7	8	3.5	8.8
49	28.7579	92	0.828829	23	120	90	44.2	90	4.7	111	192	46	124	19	13		5.1	8.49
22	20.6458	63	0.7	16.25	110	70	35.2	75	5.6	49	154	66	78	20	12		3.9	7.88
60	22.2271	78	0.83871	18.4	140	90	35.5	71	5.9	87	203	60	126	21	21	10	3.4	4.41
40	24.308	84.5	0.862245	20	110	80	40.9	79	5.3	60	198	61	125	27	8	11	3.7	3.94
47	25.2939	88	0.854369	20.5	110	70	46	72	5.8	100	207	56	131	18	10	26	4.1	1.54
45	23.5547	81	0.80198	17.7	110	75	44	80	5.2	153	201	61	109	13	12		3.6	4.11
50	24.5682	93.8	0.889943	18.9	110	70	45.6	89	4.67	76	104	56	52	14	13	15	3.4
38	30.2022	69	0.676471	21.5	117	90	43.1	72	5.7	49	211	66	135	17	18	21	3.7	3.65
24	19.3951	72.5	0.783784	15.4			32	74	5.5	104	190	51	118	12	11	16	3.6	3.49
39	29.3105	78	0.690265	23.2	110	80	53.4	77	5.28	48	107	46	51	21	18	40	2.9	4.98
32	25.8345	96.4	0.907721	20.5	120	80	46.8	73	5.52	67	116	54	49	16	8	11	2.1	1.27
49	23.1652	81.5	0.895604	16.4	130	90	45.2	93	4.33	92	186	39	129	11	14	11	3.4	2.57
20	20.3376	70	0.7	14.2	100	70	41	82	4.9	76	112	55	72	20	15		6	4.64
33	21.2526	77.5	0.851648	14	117	80	36.3	74	5.4	107	189	60	108	16	13	29	3	6.2
47	27.6398	88	0.826291	24	120	80	46.3	78	5.11	79	110	50	47	10	12	13	3.1	3.64
52	28.8033	88	0.893401	23	127	70	41.5	75	5.3	84	179	43	119	22	18	24	6.3	8.61
43	29.8011	94	0.886792	23	120	90	48.9	75	5.3	159	232	58	142	19	18	14	3.8	4.41
30	24.4561	82.2	0.768943	17.2	110	60	39.6	86	4.6	66	154	50	90.8	24	21	23	3.2	2.58
37	23.74	79.6	0.846809	15.7	110	80	35.9	69	5.7	51	176	65	101	15	9	11	3.5	2.87
22	24.0588	77.5	0.782828	16.5	110	70	46.6	77	5.1	82	254	94	144	22	27	14	3.9	1.79
61	23.9525	90	0.978261	20.9	140	80	33.6	103	3.8	80	231	80	135	18	14	28	4.3	5.8
36	27.5312	92	0.880383	19	110	80		83	4.7	52	167	42	115	12	15	11	5.1	3.09356
35	24.729	83.2	0.792381	18.5	110	70	47.1	75	5.2	45	153	55	89	15	13	6	3.8	1.43
54	27.6742	94	0.930693	20.4	130	80	42.6	81	4.8	70	223	44	165	19	11	20	4.6	8.2
52	24.287	92	0.92	17.5	100	60	45	76	5.1	89	178	53	107	16	11	19	3.8	2.43
21	20.727	76	0.791667	16	120	80	41.7	76	5.1	53	96	90	95	20	16	31	2.4	6.99
42	21.5497	82.4	0.826479	16.6	110	80	45.2	78.9	4.91	69	156	49	93	22	18	15	4.4	4.68
33	19.9293	76.5	0.85	19.8	90	70	35.1	82	4.7	76	198	72	111	17	10	21	2.7	6.04
49	25.2363	92	0.901961	20.5	110	80	41.4	77	5	203	263	55	167	17	17	18	3.5	1.84
33	30.0143	99	0.951923	22.3	100	70	49.7	74	5.2	78	243	72	155	17	16	20	4.5	8.65
28	20.4382	53	0.576087	14.2	107	67	42.4	65	5.9	88	148	66	64	18	19	17	2.9	4.48
65	26.3777	87.7	0.874377	24.5	120	60	39.7	71	5.4	241	331	43	240	17	21	16	4.5	8.93
46	32.872	101	0.848739	24	120	80	45.8	69	5.54	81	144	33	95	16	17	12	4	4.89
46	26.7419	87.8	0.863324	18.5	120	80	46.8	78	4.9	100	120	47	56	12	13	14	4.1	2.52
42	26.6299	89	0.831776	17.7	120	77	50.3	83	4.6	76	181	59	107	21	15	18	4.8	11.06
43	25.6059	94	0.903846	21.5	100	60	44.9	73	5.2	239	194	58	88	12	6	12	5	4.18
19	23.5863	81	0.826531	18	100	70	45.5	77	4.9	59	163	45	106	15	11		3.4	4
37	19.5167	72	0.786885	17	140	90	25.7	75	5	55	168	52	105	18	12	21	4	3.32
40	27.5749	93	0.93	22	110	90	41.2	77	4.8	30	128	63	59	19	14	39	4	6.34
43	32.8947	107.5	0.916454	23.2	122	84	49.9	73	5	76	166	41	110	18	17	19	3.7	2.77
31	24.3517	95	0.894539	20.2	100	60	43.4	70	5.2	124	202	39	138	21	20	17	2.6	1.13
34	20.3254	79	0.831579	18.3	110	60	33.2	70	5.2	36	154	49	98	14	13	16	2.6	4.91
20	36.1323	108	0.864	23.5	120	80	58.5	98	3.7	86	189	46	126	12	9		3.8	2.9
29	29.9948	84	0.903226	20	100	70	45.4	67	5.4	58	168	43	113	23	18	23	4.3	2.59
24	22.1718	77.5	0.833333	15.7	110	70	43.4	68	5.3	193	181	44	98	25	35	130	5.6	7.08
32	22.5466	79	0.782178	17.8	100	60	39.8	73	4.9		164	57	69	25	24	27	7.6	3.48
38	22.6726	79	0.822917	16	120	80	42	66	5.4	76	199	61	123	17	10		4.5	3.51
19	19.9359	64	0.695652	16.85	100	70	38.3	71	5	59	182	57	113	18	13		3.9	6.29
32	24.7475	80	0.8	22.7	110	70	44.7	72	4.9	75	171	67	89	14	10	11	4.4	3.76
28	20.5095	69.5	0.723958	15.2	95	70	37.4	72	4.9	122	172	49	99	22	20		5.3	3.17
47	22.8928	83	0.754545	18.6	117	77	39.1	65	5.4	80	232	71	145	26	35	25	3	3.55
26	32.1981	97	0.836207	21	120	90	54.1	73	4.8	106	241	50	170	16	13	18	4.5	1.02
23	20.9904	73	0.784946	15.4	103	70	41.7	73	4.7	75	191	67	109	17	9	11	4.7
43	23.4441	92.8	1.01754	19.7	100	60	39.7	70	4.9	101	136	50	74	29		27	6.9	3.21
48	24.1187	81	0.81	16.5	100	60	42.7	81	4.2	46	220	102	109	19	16		3.7	4.53
37	24.6717	87	0.857143	18.3	90	70		67	5.07	49	156	65	81	14	10	6	4.4
31	22.2635	81	0.848168	17.8	100	70	37.8	87	3.9	71	163	53	96	17	12	29	3.5	3.93
32	32	105	0.905172	23.3	120	70	53.9	93.42	3.6	86	169	46	106	16	10	13	4.9
37	29.8214	87	0.820755	22.65	125	90	50.5	84	4	125	227	54	148	19	17		3.8	13.29
37	26.4915	93.1	0.876648	19.6	120	80		96.6667	3.45	213	196	34	122	20	15	21	3.2	2.58193
38	31.0651	99	0.86087	19.8	110	90	46	74	4.5	82	255	54	155	14	9	14	4	4.51
51	26.7846	88.5	0.860895	18.6	110	80	39.8	67	4.88	89	214	61	135	18	12	15	3.1	2.71
24	29.3947	93.5	0.785714	18.5	102	62	52.1	90	3.6	38	159	49	102	17	14		3.2	10.18
27	25.3154	87	0.852941	16.3	103	60	42.9	72	4.5	75	191	63	113	30	24	21	5.3	10.05
41	23.6408	82	0.763501	18.1	120	90		74	4.36	50	205	72	123	16	10	20	3.3	3.107
32	19.2392	64	0.711111	14	90	50	29.1	75	4.3	102	243	126	97	15	15	16	3.1	4.43
37	23.4	74.5	0.730392	16.1	110	70	39.3	91.98	3.5	66	195	58	124	12	8	14	4
42	20.5187	80.5	0.867457	19.6	110	60	36.9	73	4.4	55	164	92	61	31	34	33	3.3	3.85
28	23.3103	72	0.888889	18	110	70	45.6	73	4.4	117	188	71	94	23	15	14	5.2	4.17
42	25.9	96	0.897196	21.5	120	80	42.5	81.9	3.9	124	178	42	111	14	12	17	3.1
44	30.2022	87.5	0.788288	21	120	80	47	84	3.8	70	200	62	124	17	15	7	4.2	0.8
58	23.0291	89.4	0.930281	19.4	120	90	35.9	76	4.2	242	258	52	158	16	10	12	4.8	5.12
54	26.0375	89	0.881188	21.9	120	80	41.1	86	3.7	75	178	69	94	20	10		5.4	8.05
62	30.1333	88.5	0.855072	18.5	130	80	41.4	85	3.7	135	246	65	154	17	13		2.7	5.66
45	22.6428	97.3	0.942829	17.5	110	70	42.5	73	4.3	238	199	62	89	13	11	25	6	7.03
45	23.3535	90	0.947368	20.5	120	80	50.4	88	3.5	201	184	30	114	33		32	4.43	3.42
28	29.4331	91.2	0.847584	20.2	120	80	43.2	81	3.8	56	121	40	70	18	15	14	4.6
42	27.1484	87	0.801843	17	110	70	46	75	4.1	74	156	46	95	14	15	19	4.7	2.84
60	21.4187	76	0.745098	16.4	130	80	43.8	83	3.7	70	230	80	136	22	12	23	4.7	7.87
22	24.999	89	0.855769	18.15	120	80	46.3	73	4.2	70	162	75	73	15	18		4.1	5.65
26	19.3879	72	0.757895	15.8	100	60	35.6	74	4.1	173	202	51	116	17	18		3.9	4.4
48	26.2284	98.3	0.923872	19.8	110	70	55.3	87	3.45	98	101	45	47	11	12	13	3.5
45	20.6943	84.6	0.921569	18	122	90	35.3	76	3.9	37	131	61	63	15	13	19	4.3	4.41
25	24.7123	87	0.820755	17.5	100	70	42.2	76	3.9	87	199	53	129	28	24	12	3.9	11
55	25.9488	87.5	0.744681	20	112	79	44.4	74	4	139	229	51	150	22	25	16	3.7	2.33
23	23.5482	74.7	0.738434	14.1	100	70	49.7	80	3.7	50	193	58	125	20	13	8	4.5	3.13
29	23.9844	86.4	0.889804	16.8	120	70	43	76	3.86	78	101	45	47	13	14	12	2.6	2.85
36	23.3176	82	0.82	18	100	60	39.8	74	3.9	68	192	62	116	19	17	37	5	1.79
23	19.9476	61	0.655914	18.05	100	70	43	87	3.3	67	146	38	95	16	10		3.3	2.82
33	22.0948	83	0.84264	16	90	60	37.8	73	3.9	40	182	72	102	16	13	16	3.9	3.85
60	30.6764	103	0.887931	24	115	76	46.3	86	3.3	56	164	38	115	27	26	13	5.5	0.98
30	24.4646	67	0.614679	16.5	110	57	43	81	3.5	102	210	73	117	16	14	17	4.1	7.49
37	30.863	104.8	0.908146	22.1	110	80	51.1	94	3									1.56
22	23.3355	87	0.820755	17.2	110	65	45.6	70	4	75	115	48	52	18	36		4	4.88
34	19.6602	71.5	0.744792	15.5	90	56	34.6	82	3.4	97	141	50	72	13	10	12	3.2	7.51
58	30.9364	103	0.976303	24	150	110		72	3.87	161	220	71	117	22	24	75	4.3
50	21.3407	86	0.895833	18.5	120	80	41.3	87	3.2	135	200	65	108	22	27	20	4	3.75
22	29.0947	91	0.842593	20	120	80	43.5	72	3.86	44	125	52	64	19	15	23	4.4	4.8
28	31.4453	105	0.945946	23	90	60		69	4.02	137	156	44	85	13	13	19	2.9
49	30.7087	92.2	0.861682	22.5	120	90	51.2	83	3.3	119	177	48	105	29		27	6.7	2.96
42	25.3516	85	0.833333	19	100	70	43.6	76	3.6	59	188	49	127	17	11	20	3.3	1.52
39	23.3594	82	0.849741	16.5	100	60	42.4	76	3.6	58	183	51	120	19	19	14	3.6	2.69
58	28.5461	92.8	0.851376	22.8	130	80	43.5	85	3.2	89	204	60	126	17	16	19	3.5	1.34
31	32.7672	101	0.827869	24.8	110	70	51.4	73	3.7	63	201	59	129	15	12	11	4.2	2.72015
43	22.3948	74	0.755102	17	110	80	37.9	77	3.5	117	201	108	70	17	11		3.4	12.76
25	21.6713	65	0.631068	15.5	120	70	41.9	81	3.3	45	171	71	91	21	14		2.5	8.7
52	26.7301	100	0.933707	21	120	70	35.6	70	3.8	80	224	64	144	22	14	32	3.3	3.71
55	23.7326	81	0.771429	19	130	80	44.6	76	3.5	130	249	45	178	21	12	17	4.7	4.58
44	21.1621	75.7	0.803609	16.9	110	80	37.6	119	2.21	44	264	93	162	14	10	22	2.6	3.98
35	28.2559	92.3	0.835294	19.4	120	90	46.2	77	3.4	59	161	72	77	16	12	10	3.1	5.54
54	28.8415	100.1	0.942561	20.8	120	70	48.1	73	3.56	138	242	53	161	23	22	13	3.2	2.87
47	19.5694	73	0.755694	15.6	90	60	31.8	72	3.6	51	208	103	95	21	16	14	2.1	5.96
47	27.4219	79	0.822917	21.3	110	80	45.6	76	3.4	64	196	50	133	15	12	17	4.8	6.2
40	22.3659	82	0.82	16.5	110	66	47.2	73	3.5	53	174	76	87	17	12	5	3.8	5.26
37	21.1219	75	0.842697	16.5	100	60		77	3.26	42	117	46	69	19	15	9	3.1
19	24.9183	78	0.702703	16	114	76	49.1	79	3.1	76	160	55	90	17	13	13	3.5	2.72
27	20.7163	85	0.862944	19.6	105	65	39.6	69	3.5	114	159	53	83	19	9	22	2.6	4.44
21	20.2924	67	0.736264	16.1	90	55	39.7	70	3.4	69	150	47	89	20	21	11	4.3	13.41
25	23.5101	82.5	0.808824	18.4	120	70	45.8	82	2.9	147	199	40	130	19	12		4.2	1.98
33	26.5752	84	0.865979	17			45.5	74	3.2	62	182	47	123	24	25	21	4.8	8.78
38	35.4137	114	0.964467	25.4	120	80		68	3.43667	65	137	60	64	15	12	28	4.2	3.03236
44	22.8386	84	0.865979	17.5	110	70	41.2	75	3.1	36	169	64	98	15	12	10	4.5	2.27
23	27.2025	88	0.81106	17.9	100	70	40.9	79	2.9	38	134	48	78	15	11		3.1	1.74
48	24.8889	79	0.806122	16.5	130	90	46.5	72	3.1	50	144	60	74	19	19		3.4	2.63
42	25.8372	96	0.897196	21.5	120	80	42.5	103	2	124	178	42	111	14	12	17	3.1	10.05
25	22.2599	103	1.0404	28.75	100	67	43.1	65	3.1	196	134	51	44					7.49
30	25.5729	83	0.790476	19.3	120	80	46.7	78	2.4	130	192	72	94	19	22	23	4.9	7.7
58	25.7619	104	0.954128	22.2	120	80	50.1	74	2.5	69	160	69	77	14	12		3.5	8.01
38	19.6533	79	0.822917	15.8	110	70	42.5	76	2.4	53	143	48	84	19	16	18	2.4	3.37
49	23.2	82.5	0.884244	17	120	70	38.8	86.04	2.1	112	219	43	154	26	37	94	6.6
34	27.5	92	0.8	19.9	120	80	52.2	100.08	1.8	46	189	64	116	14	12	18	4.6
30	27.8316	95	0.87156	20.7	110	60	48.1	78	2.3	48	134	55	69	16	10	15	3.9	6.72
25	22.6286	83.4	0.821675	18	110	80	51.9	72	2.4	90	175	51	106	19		20	4.2	3.45
40	29.9	92	0.828829	21.6	110	70	45.8	82.08	2.1	69	181	42	125	20	25	38	7.4
19	19.721	81.5	0.84456	17.5	90	60	44.9	79	2.1	65	141	51	77	17	12		4.6	4.07
41	21.3655	82	0.854167	17.3	80	50	37.5	80	2	64	184	47	124	13	10	13	3.9	1.23
36	24.9425	91	0.892157	19.3	110	80	41.8	72	2.2	83	150	62	71	16	13	19	3.6	6.46
42	26.7578	95	0.913462	19.7	90	60	43.6	77	2	90	187	50	119	17	12	18	4.4	4.91
36	30.8758	99.3	0.975442	20.3	120	80		68.3333	2.17667	131	182	40	116	23	19	23	3.2	1.84313
39	25.4	85	0.834151	19.3	100	70	45.1	95.94	1.5	159	182	42	108	15	20	27	3.3	2.94
31	35.2568	107	0.884298	28	130	90	51.6	78	1.8	502	228	33	95	22	30	69	6.3	0.91
42	36.0444	103.5	0.8625	22.3	120	90	45.8	84	1.6	148	258	41	187	16	11	11	6.6	2.08
48	20.4	75	0.777202	15.7	110	70	36.9	76.14	1.7	65	212	68	131	18	13	16	3.8
45	30.12	100	0.990099	23.3	130	90	49.8	104.94	1.2	101	140	28	92	19	17	12	3.4
54	23.618	86.5	0.867603	18.5	100	60	43.1	74	1.6	74	202	80	107	24	9	11	3.1	10.44
55	27.1746	92	0.855814	19.9	120	80	42.5	79	1	73	162	40	107	15	15		4.8	9.45
